# Supplementary material for: Balancing Microalgae and Nitrifiers for Wastewater Treatment: Can Inorganic Carbon Limitation Cause an Environmental Threat?
Source: PubMed Central journal article supplement (PMC8028045; doi:10.1021/acs.est.0c05264), 2021-03-03
Supplement: es0c05264_si_001.pdf [file es0c05264_si_001.pdf]

SI.1 Pilot-scale raceway layout

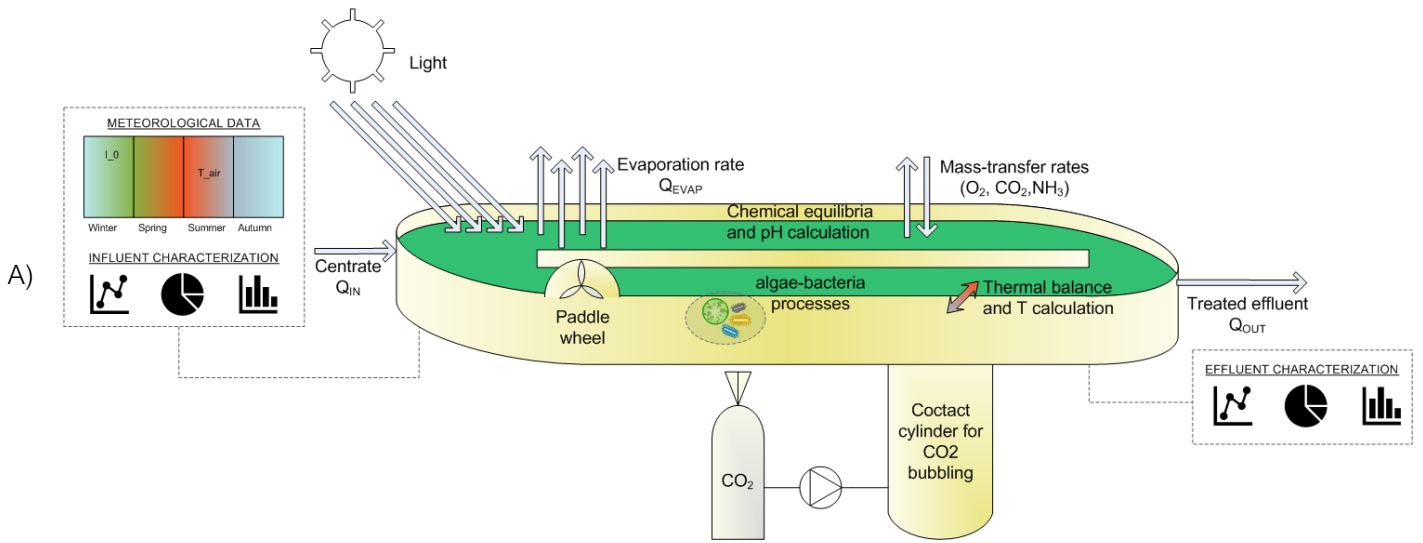

B)

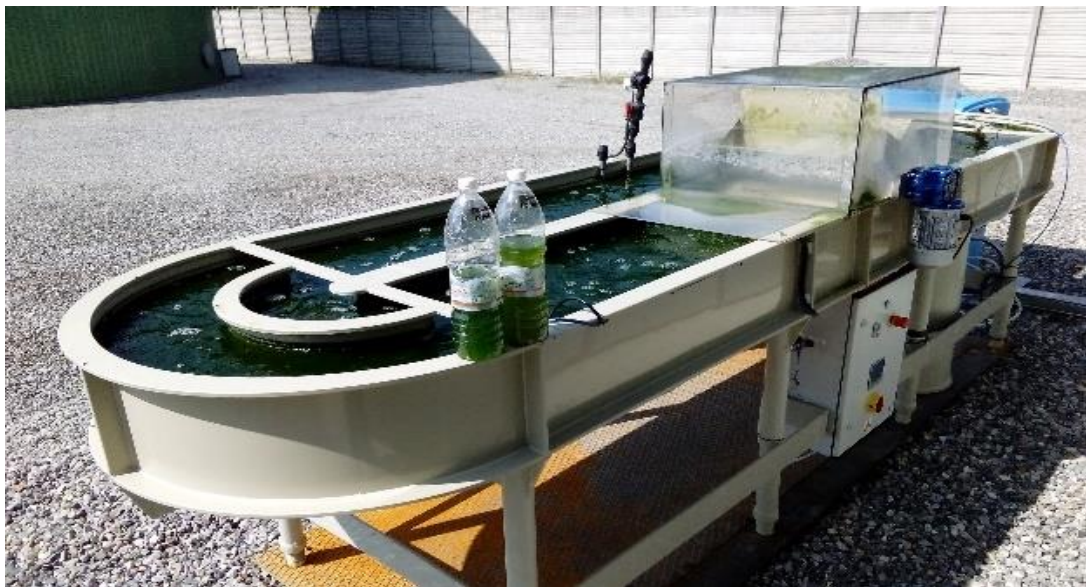

22 Figure SI.1.1. Scheme of the pilot-scale HRABP setup (A); picture of the pilot-scale HRABP (B).

23 **SI.2 Evaluation of experimental measurements uncertainty**

24

25 The standard deviation was estimated from the variation coefficient presented in Table SI.1.1.

26 For measurements lower than a threshold  $\varpi$  the standard deviation is assumed to be

27 constant.

28

29 **Table SI.2.1.** Measurement uncertainty modelling: standard deviation as a function of the mean value  $\omega$ .

| Measurement                     | Unit                              | Threshold | Standard deviation |                   |
|---------------------------------|-----------------------------------|-----------|--------------------|-------------------|
|                                 |                                   | $\varpi$  | $\omega < \varpi$  | $\varpi < \omega$ |
| DO                              | mgO <sub>2</sub> .L <sup>-1</sup> | -         | -                  | 5% $\varpi$       |
| pH                              | -                                 | -         | -                  | 2% $\varpi$       |
| sCOD                            | mgCOD L <sup>-1</sup>             | 5         | 1                  | 20% $\varpi$      |
| COD <sub>ALG</sub>              | mgCOD L <sup>-1</sup>             | 5         | 1                  | 20% $\varpi$      |
| P-PO <sub>4</sub> <sup>3-</sup> | mgP L <sup>-1</sup>               | 5         | 1                  | 20% $\varpi$      |
| TAN                             | mgN L <sup>-1</sup>               | 5         | 1                  | 20% $\varpi$      |
| N-NO <sub>3</sub> <sup>-</sup>  | mgN L <sup>-1</sup>               | 5         | 1                  | 20% $\varpi$      |
| N-NO <sub>2</sub>               | mgN L <sup>-1</sup>               | 5         | 1                  | 20% $\varpi$      |

30

31

### SI.3 Correlation between optical density (680 nm) and TSS concentration

32

33

34 To determine the experimental algal biomass concentration, expressed in COD ( $X_{ALG\_meas}$  in

35 Fig.2C), the correlation factor among the  $OD_{680}$  and the TSS concentration was evaluated

36 (Fig. SI 2.1), first multiplying the value of each TSS measurement for the conversion factor of

37  $1.57 \text{ gCOD gBM}_{ALG}^{-1}$  (from the stoichiometry) and for the ratio  $0.87 \text{ gVSS gTSS}^{-1}$  (from

38 experimental measurements). Thus, it was assumed that all the VSS were made of algal

39 biomass. This hypothesis was done since experimental data of biomass fractionation in the

40 raceway were not available. The model showed that the simulated algal biomass fraction was

41 90.2% of the total active biomass, on average (including bacteria, see Fig.SI.6.1 A).

42

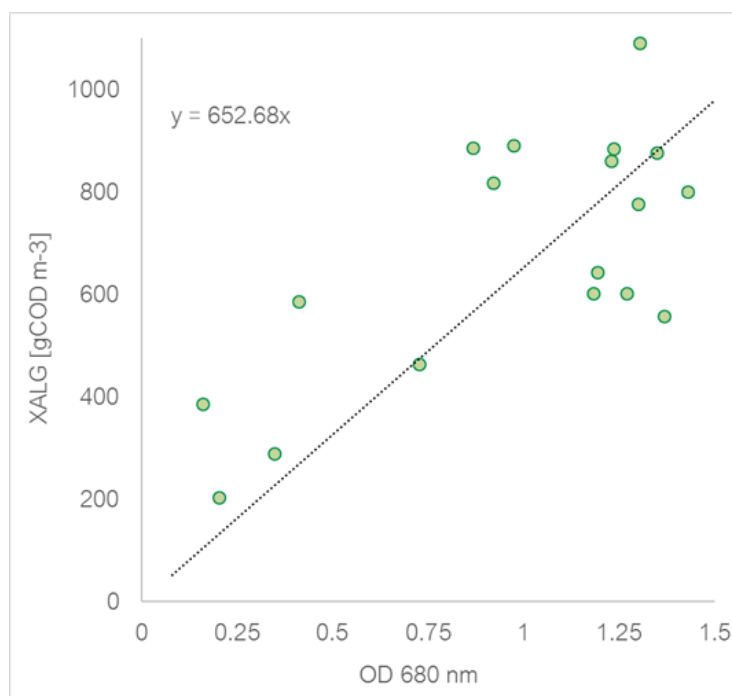

43

44

Figure SI.3.1. Correlation between the optical density at 680 nm ( $OD_{680}$ ) and the algal biomass concentration ( $X_{ALG}$ , g COD  $m^{-3}$ ) for the Milan case study.

45

46

47

48

### SI.4 Weather dataset

49

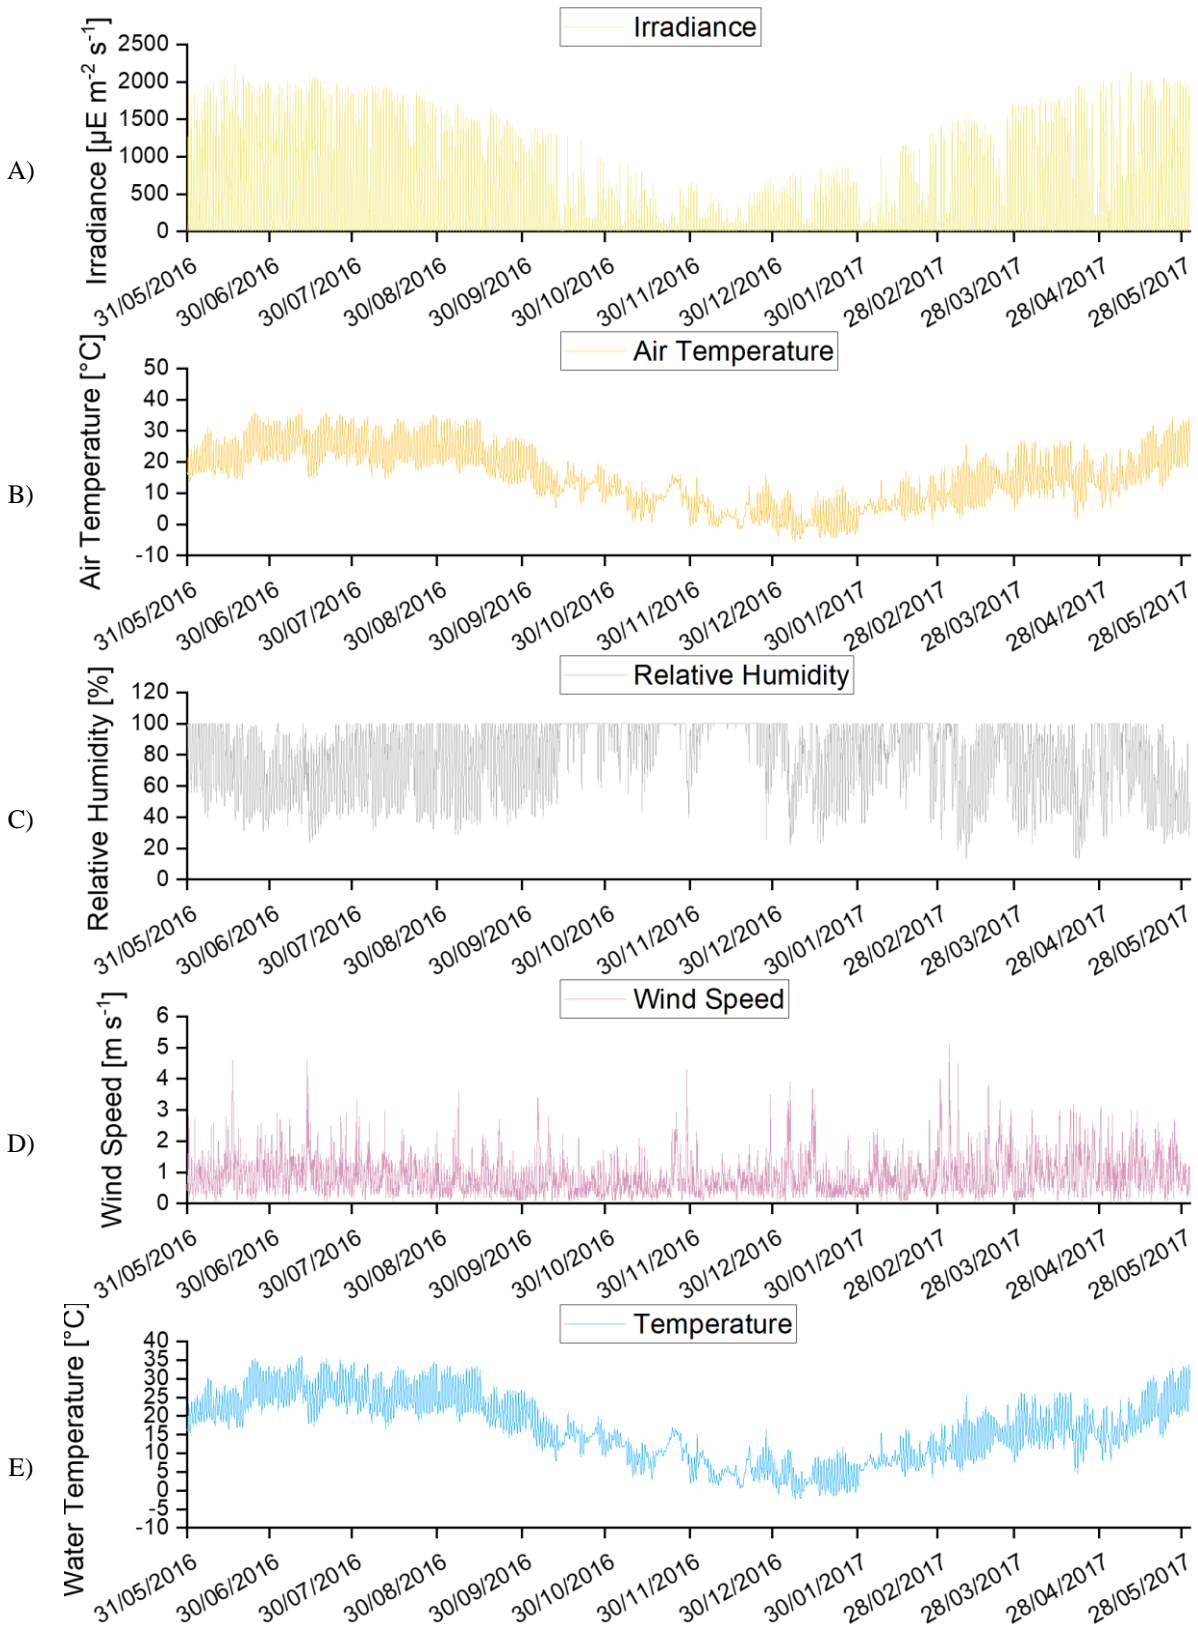

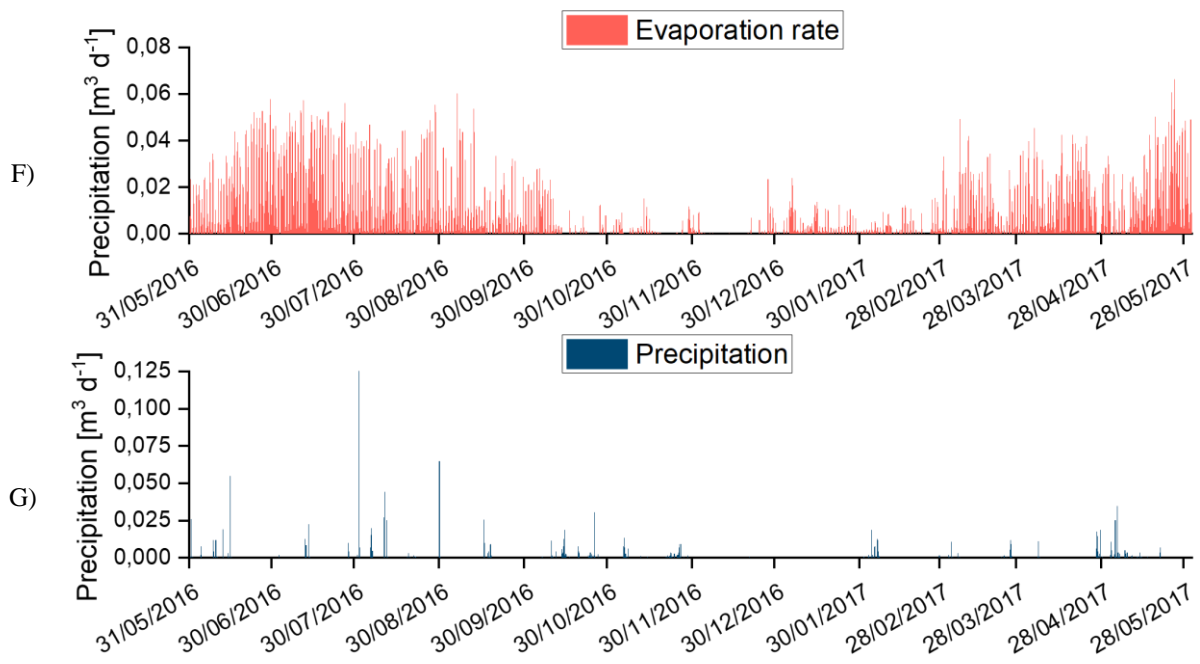

50 **Figure SI.4.1.** Weather dataset used for simulations: irradiance (A), air temperature (B), relative humidity (C),  
 51 wind speed (D), pond temperature (E), evaporation rate (F), precipitation (G).

52

## SI.5 Temperature effect on oxygen profile

53  
54

55 Simulations were run to better understand the role played by temperature variations on the  
56 daily DO profile (Fig. SI.4.1). In addition to the results obtained running the model with the  
57 simulated temperature, simulations were run at the constant temperatures of 26 °C and 6°C  
58 (average temperature measured in summer and winter respectively). It can be clearly seen  
59 that the DO predictions obtained without accounting for temperature variations are not able to  
60 catch these dynamics. Indeed, only in the case where temperature affects DO solubility, the  
61 positive slope of the DO curve observed during the night can be effectively reproduced, while  
62 in all other cases, the DO curve is flat, or characterized by a negative slope.

63

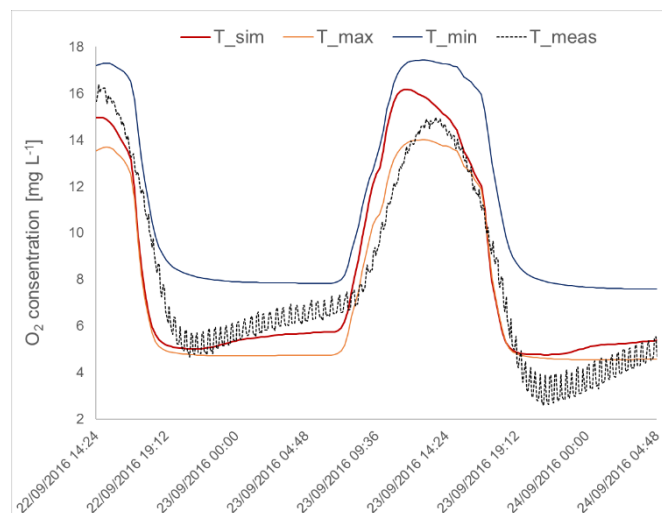

64

65 **Figure SI.5.1.** Temperature effect on dissolved oxygen daily dynamics: comparison between measured DO  
66 (black dotted line), simulated DO profiles under real dynamic temperature conditions (red line), constant  
67 temperature at 26°C (orange line), constant temperature at 6°C (blue line).

68

69

## SI.6 Biomass fractionation

70

71

72 The biomass fractionation in the system, expressed in percentage, has been computed. In the  
73 present case study (Milan, I), where the 1 m<sup>3</sup> raceway was fed with diluted swine centrate, the  
74 system was mainly autotrophic, due to the influent characteristics (high N,P concentration and  
75 COD mainly recalcitrant) and the pH-control with CO<sub>2</sub> injection.

76 On the contrary, in the experimentation carried out in Casagli et al.<sup>1</sup> (Narbonne, FR), with 17  
77 m<sup>3</sup> raceway fed with synthetic medium (simulating a municipal wastewater) the resulting  
78 biomass fractionations highlighted that heterotrophic bacteria were colonizing the system,  
79 together with algae, while nitrifiers constituted just the 1.44 % of the total biomass in average.  
80 Influent characteristics (high biodegradable organic matter) and no pH control active (source  
81 of additional inorganic carbon in the system), are the main responsible of the very low fraction  
82 of nitrifiers developed.

83

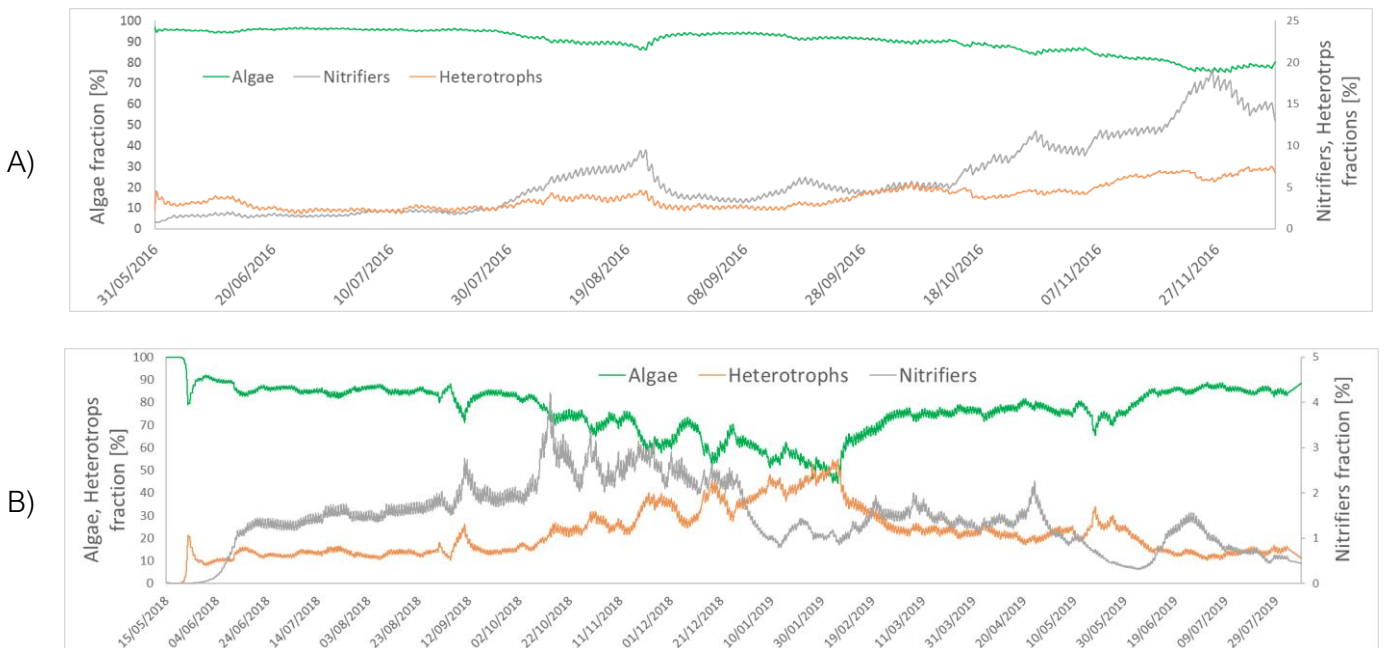

84 **Figure SI.6.1.** Biomass fractionation in percentage simulated by the model, divided among algae, heterotrophic  
85 bacteria and nitrifying bacteria (AOB+NOB). A): Milan case study, swine diluted centrate as influent. B):  
86 Narbonne case study, synthetic wastewater (reproducing a municipal one).

87



88 **SI.7 Temperature sub-model: calibration and validation**

89 A simple autoregressive model was developed to predict the temperature in the water  
90 ( $T_{\text{POND}}(t)$ ) at time  $t$  from the measurement of the temperature in the air  $T_{\text{AIR}}(t)$  at the same time  
91  $t$  and from the temperature in the air at time  $t-\Delta$ ,  $T_{\text{AIR}}(t-\Delta)$ , where  $\Delta$  is a time delay. A linear  
92 regression was computed for a range of delays  $\Delta$ , and the delay providing the best regression  
93 (for  $\Delta=4$  hours) was finally selected.

94 The best regression was associated to  $R^2=0.98$ , given by:

95 
$$T_{\text{POND}}(t)=0.46 \cdot T_{\text{AIR}}(t)+0.49 \cdot T_{\text{AIR}}(t-4)+2.18$$

96  $T_{\text{AIR}}(t-4)$  is the air temperature measured 4 hours before the time  $t$ .

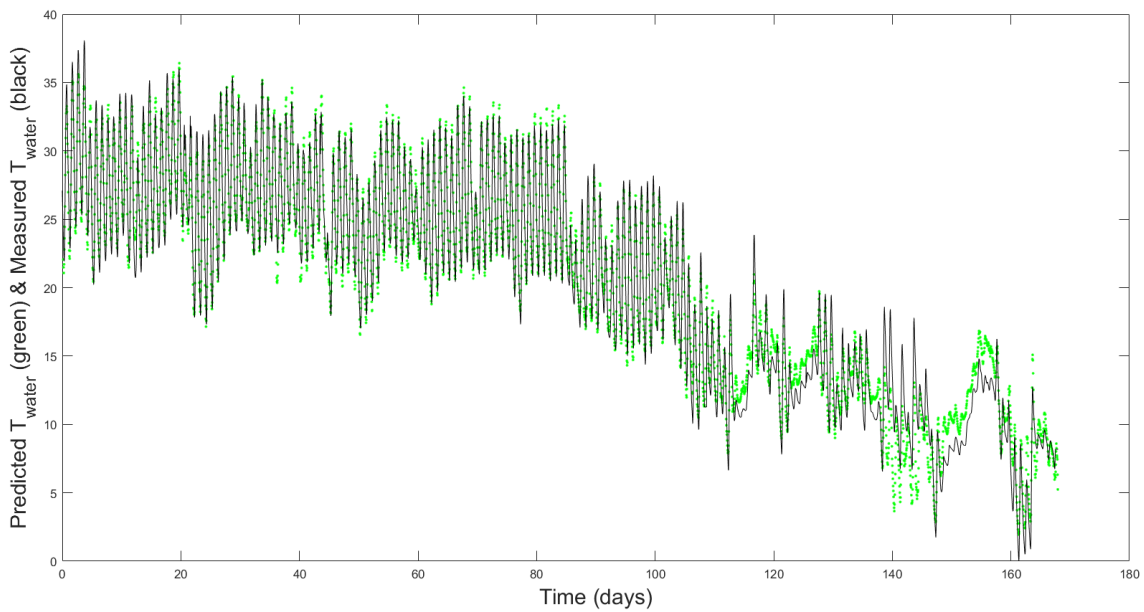

97 **Figure SI.7.1.** Measured and predicted pond temperature ( $R^2=0.98$ ); the black line represents the measured  
98 pond temperature; the light green line represents the simulated pond temperature.

99

## SI.8 pH control implementation

100 The pH control system was implemented in the ALBA model<sup>1</sup> as reported below (Eq. SI.8.1):

$$101 \quad \text{Rate}_{\text{pHcontrol}} [\text{gC m}^{-3} \text{d}^{-1}] = \begin{cases} \Delta_{\text{pH}} \cdot \theta^{T-20} \cdot k_{\text{La}} \cdot \left(\frac{D_{\text{CO}_2}}{D_{\text{O}_2}}\right)^{0.5} \cdot (H_{\text{CO}_2}(\text{T}) \cdot p_{\text{CO}_2} - \text{CO}_2) & \Delta_{\text{pH}} > 0 \\ 0 & \Delta_{\text{pH}} \leq 0 \end{cases}$$

102 where:

103  $\Delta_{\text{pH}} = (\text{pH}_s - \text{pH}_{\text{tMAX}})$  is the difference between the simulated pH and the value set as maximum

104 threshold reachable in the system for which the injection of  $\text{CO}_2$  does not start.

105  $D_{\text{CO}_2}$  and  $D_{\text{O}_2}$  are the diffusion coefficients of  $\text{CO}_2$  and  $\text{O}_2$  respectively [ $\text{m}^2 \text{s}^{-1}$ ];  $k_{\text{La}}$  is the mass

106 transfer coefficient [ $\text{d}^{-1}$ ];  $H_{\text{CO}_2}(\text{T})$  is the Henry constant for  $\text{CO}_2$  with temperature correction

107 [ $\text{gC-CO}_2 \text{ m}^{-3} \text{d}^{-1} \text{atm}^{-1}$ ];  $p_{\text{CO}_2}$  is the partial pressure of  $\text{CO}_2$  (set as 1 atm, since during the

108 experimentation pure  $\text{CO}_2$  was injected for controlling pH);  $\text{CO}_2$  represents the concentration

109 in the bulk volume [ $\text{gC-CO}_2 \text{ m}^{-3}$ ];  $\theta$  is the temperature correction factor for the mass transfer

110 coefficient  $k_{\text{La}}$ .

111 In practice, the pH-control is modelled in a similar way as the  $\text{CO}_2$  gas-liquid exchange with

112 atmosphere but considering a different pressure of the gas and proportionally to the

113 difference between pH in the raceway and the maximum pH allowed in the pond.

114

115

116

117

118

119

120

121

## SI.9 Alkalinity

122

123

124 Total Alkalinity (TA) was computed according to Dickson<sup>2</sup> and Wolf-Gladrow et al.<sup>3</sup> as

125 reported below (Eq. SI.9.1):

126

$$\text{TA} = \text{HCO}_3^- + 2\text{CO}_3^{2-} + \text{H}_2\text{PO}_4^- + \text{HPO}_4^{2-} + 2\text{PO}_4^{3-} + \text{OH}^- + \text{NH}_3 - \text{H}^+ - \text{HNO}_2 - \text{HNO}_3 - \text{H}_3\text{PO}_4 \quad \text{SI.9.1}$$

127

128 The digestate can present significant concentrations of volatile fatty acids (VFA - acetate,

129 butyrate, propionate and valerate) and hydrogen sulphide. In this case, the Total Alkalinity

130 formula should account also for them, as reported below (Eq. SI.9.2):

131

$$\text{TA} = \text{HCO}_3^- + 2\text{CO}_3^{2-} + \text{H}_2\text{PO}_4^- + \text{HPO}_4^{2-} + 2\text{PO}_4^{3-} + \text{OH}^- + \text{NH}_3 + \text{C}_2\text{H}_3\text{OO}^- + \text{C}_4\text{H}_7\text{OO}^- + \text{C}_3\text{H}_5\text{OO}^- + \text{C}_5\text{H}_9\text{OO}^- + \text{HS}^- + 2\text{S}^{2-} - \text{H}^+ - \text{HNO}_2 - \text{HNO}_3 - \text{H}_3\text{PO}_4 \quad \text{SI.9.2}$$

132

133 Dynamic simulations (see Fig.2) were first run at pH controlled with CO<sub>2</sub> injection at a setpoint

134 of 7.5, well known for guarantying not limiting CO<sub>2</sub> conditions for algae and nitrifiers growth.

135 However, the model revealed dissolved inorganic carbon limitation conditions, as shown in

136 Fig. SI.9.1 (line S\_IC). Indeed, a close look at alkalinity (Fig. SI.9.1, line TA) highlights a

137 regular drop, due to both the exhaustion of ammonium and the production of nitrate and

138 nitrite (see Fig. 2A and 2B) . The resulting very low alkalinity does not allow to store

139 bicarbonate in solution. More generally, the level of dissolved inorganic carbon remains

140 definitely limiting and therefore a strong competition for inorganic carbon between algae and

141 nitrifiers occurs.

142 Additional simulations were run increasing the influent alkalinity concentration of 10 mol m<sup>-3</sup>

143 (TA\_2), 15 mol m<sup>-3</sup> (TA\_2.5) and 20 mol m<sup>-3</sup> (TA\_3), tuning the variable  $\Delta_{\text{CAT,AN\_IN}}$  (by

144 multiplying it by a factor of 2, 2.5 and 3) to reproduce this effect and maintaining a regulated

145 pH at 7.5. Results are shown in Fig. SI.9.1, in terms of TA concentration ( $\text{mol m}^{-3}$ ) and the  
 146 corresponding S\_IC concentration ( $\text{mgC L}^{-1}$ ). It is evident that increasing the influent alkalinity  
 147 allows to store considerably higher concentration of dissolved inorganic carbon, solving issues  
 148 as the competition between algae and nitrifiers and the favourable conditions for  $\text{N}_2\text{O}$   
 149 production and emission.

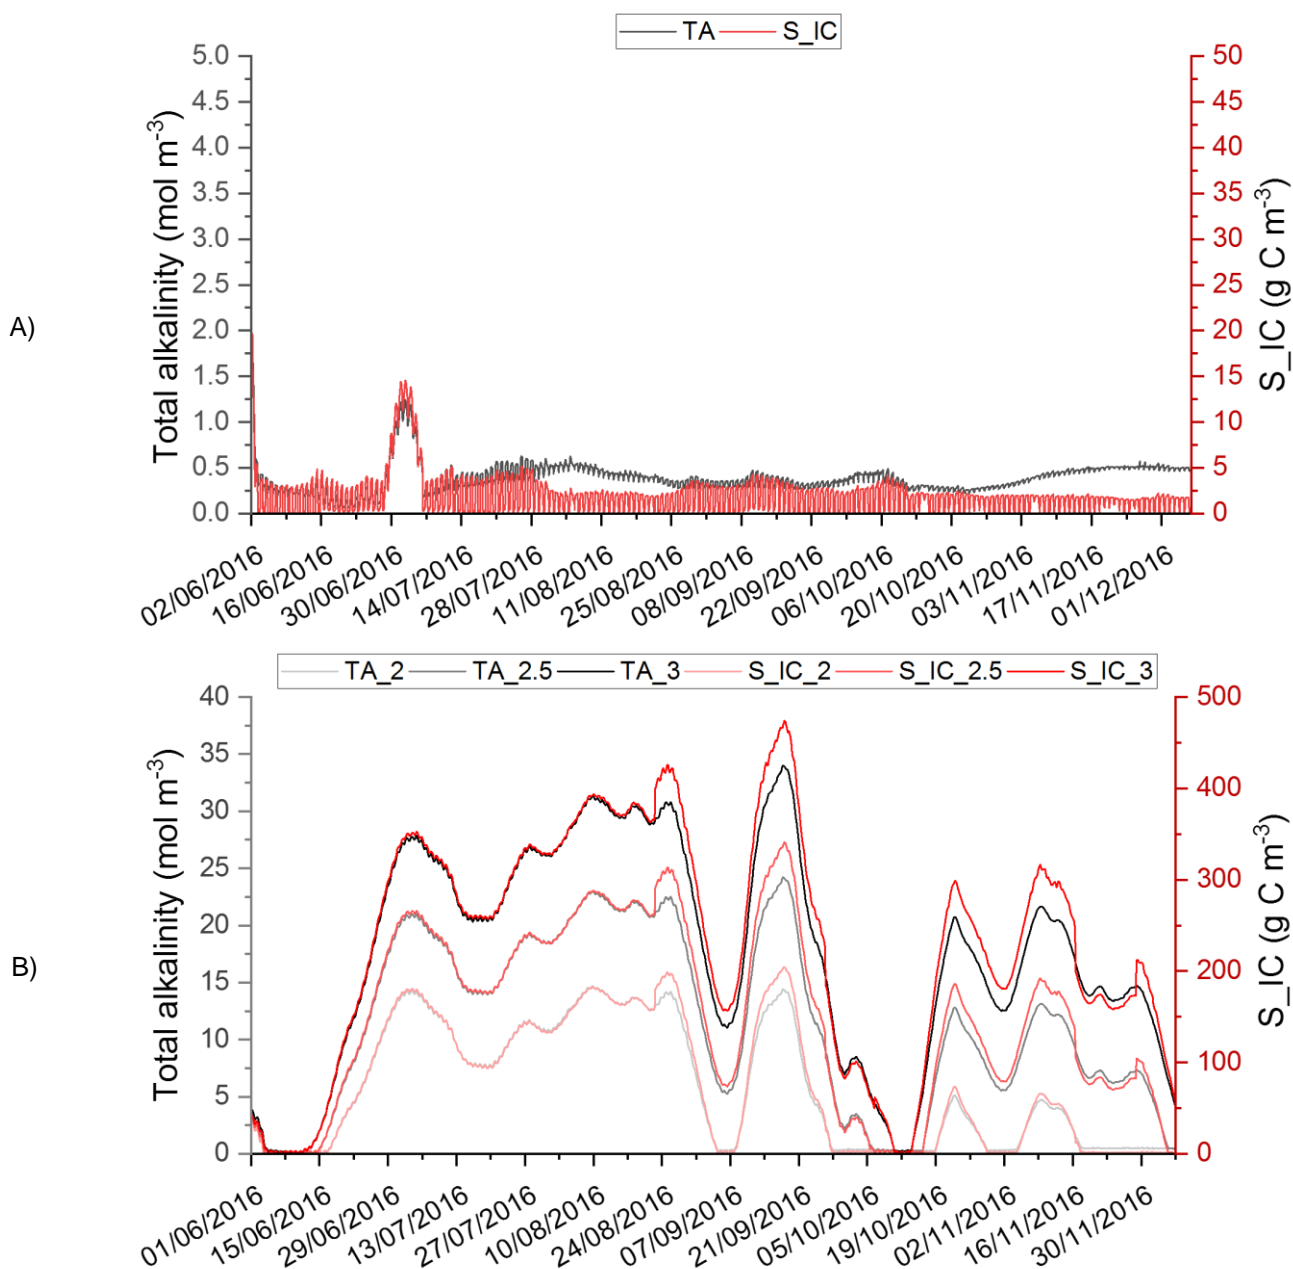

150 **Figure SI.9.1.** Dynamic simulations of alkalinity (left axis) and inorganic carbon (S\_IC, right axis) at different  
 151 influent alkalinity concentrations: A) Reference case (S1); B) simulations at influent alkalinity increased by 10, 15  
 152 and 20  $\text{mol m}^{-3}$ , respectively. The alkalinity is computed as in Eq. SI.9.1.

153

## Sl.10 Scenarios analysis results

154 Table Sl.10.1. Simulation results describing the system performances in spring.

| RESULTS: SPRING       |     |     |                    |                                         |                                           |                                           |                                                                     |                                                       |                       |                                                       |                    |          |
|-----------------------|-----|-----|--------------------|-----------------------------------------|-------------------------------------------|-------------------------------------------|---------------------------------------------------------------------|-------------------------------------------------------|-----------------------|-------------------------------------------------------|--------------------|----------|
| Parameter tested      | HRT | pH  | k <sub>La</sub>    | X <sub>ALG_prod</sub>                   | APPARENT SNH_REM_RATE                     | ACTUAL SNH_REM_RATE                       | SPO <sub>4</sub> REM_RATE                                           | CO <sub>2</sub> TRAN_RATE(**)                         | S_IC                  | NH <sub>3</sub> TRAN_RATE                             | N <sub>2</sub> O_f | Scenario |
| -                     | [d] | [-] | [d <sup>-1</sup> ] | [gTSS m <sup>-2</sup> d <sup>-1</sup> ] | [gN-TAN m <sup>-2</sup> d <sup>-1</sup> ] | [gN-TAN m <sup>-2</sup> d <sup>-1</sup> ] | [gP-PO <sub>4</sub> <sup>3-</sup> m <sup>-2</sup> d <sup>-1</sup> ] | [gC-CO <sub>2</sub> m <sup>-3</sup> d <sup>-1</sup> ] | [gC m <sup>-3</sup> ] | [gN-NH <sub>3</sub> m <sup>-2</sup> d <sup>-1</sup> ] | [%]                | n°       |
| k <sub>La</sub> , HRT | 10  | 7.5 | 34                 | 12.28                                   | 6.91                                      | 5.74                                      | 0.18                                                                | -1.63                                                 | 1.67                  | -1.18                                                 | 56                 | 1        |
|                       | 10  | 7.5 | 0.5                | 13.38                                   | 7.04                                      | 7.04                                      | 0.20                                                                | 1.63                                                  | 8.69                  | -0.01                                                 | 27                 | 2        |
| HRT                   | 2   | 7.5 | 34                 | 22.09                                   | 20.08                                     | 1.75                                      | 0.29                                                                | 24.55                                                 | 256.48                | -18.33                                                | 0                  | 3        |
|                       | 2   | 7   | 34                 | 21.60                                   | 10.31                                     | 1.69                                      | 0.28                                                                | 74.52                                                 | 360.02                | -8.62                                                 | 0                  | 3.1      |
|                       | 2   | 6.5 | 34                 | 21.13                                   | 4.83                                      | 1.64                                      | 0.28                                                                | 122.84                                                | 459.43                | -3.18                                                 | 0                  | 3.2      |
|                       | 5   | 7.5 | 34                 | 18.34                                   | 13.13                                     | 11.41                                     | 0.27                                                                | -17.97                                                | 3.4                   | -1.72                                                 | 45                 | 4        |
|                       | 5   | 7.5 | 0.5                | 19.49                                   | 11.24                                     | 11.19                                     | 0.27                                                                | -2.43                                                 | 76.8                  | -0.05                                                 | 0                  | 4.1      |
|                       | 15  | 7.5 | 34                 | 8.87                                    | 4.73                                      | 3.86                                      | 0.13                                                                | 0.83                                                  | 1.39                  | -0.86                                                 | 60                 | 5        |
|                       | 20  | 7.5 | 34                 | 6.56                                    | 3.60                                      | 2.90                                      | 0.10                                                                | 0.79                                                  | 1.28                  | -0.70                                                 | 61                 | 6        |
| pH                    | 5   | 6.5 | 34                 | 17.37                                   | 12.28                                     | 12.28                                     | 0.26                                                                | -20.31                                                | 2.94                  | 0.00                                                  | 46                 | 7        |
|                       | 5   | 7   | 34                 | 18.02                                   | 12.29                                     | 12.29                                     | 0.27                                                                | -19.09                                                | 2.91                  | 0.00                                                  | 47                 | 8        |
|                       | 5   | 8   | 34                 | 18.03                                   | 14.42                                     | 9.94                                      | 0.26                                                                | -19.57                                                | 4.22                  | -4.49                                                 | 41                 | 9        |
|                       | 5   | NC  | 34                 | 15.47                                   | 15.10                                     | 8.94                                      | 0.22                                                                | -24.79                                                | 4.75                  | -6.16                                                 | 39                 | 10       |
| TA(*)                 | 5   | 7.5 | 34                 | 18.83                                   | 16.29                                     | 16.29                                     | 0.29                                                                | 8.37                                                  | 132.13                | 0.00                                                  | 0                  | 11       |
| pH                    | 10  | 6.5 | 34                 | 12.29                                   | 6.33                                      | 6.33                                      | 0.18                                                                | -2.22                                                 | 1.44                  | 0.00                                                  | 63                 | 12       |
|                       | 10  | 7   | 34                 | 12.51                                   | 6.34                                      | 6.34                                      | 0.18                                                                | -1.54                                                 | 1.50                  | 0.00                                                  | 60                 | 13       |
|                       | 10  | 8   | 34                 | 11.42                                   | 7.58                                      | 4.97                                      | 0.17                                                                | -4.38                                                 | 1.99                  | -2.61                                                 | 53                 | 14       |
|                       | 10  | NC  | 34                 | 6.92                                    | 7.91                                      | 4.18                                      | 0.10                                                                | -14.05                                                | 2.06                  | -3.73                                                 | 54                 | 15       |

(\*)TA=Total Alkalinity. In this scenario, the concentration of TA (expressed in mol m<sup>-3</sup>) in the influent was increased by 20 mol m<sup>-3</sup>.

(\*\*)The CO<sub>2</sub> transfer rate is expressed for unit of volume. To obtain the surface transfer rate, it' sufficient to divide the value for the raceway surface (3.8 m<sup>2</sup>), since the reactor volume was 1 m<sup>3</sup>.

155

156 Table SI.10.2. Simulation results describing the system performances in summer.

| RESULTS: SUMMER                                 |     |     |                    |                                         |                                           |                                           |                                                                     |                                                       |                       |                                                       |                    |          |
|-------------------------------------------------|-----|-----|--------------------|-----------------------------------------|-------------------------------------------|-------------------------------------------|---------------------------------------------------------------------|-------------------------------------------------------|-----------------------|-------------------------------------------------------|--------------------|----------|
| Effect tested                                   | HRT | pH  | k <sub>La</sub>    | X_ALG prod                              | APPARENT SNH_REM_RATE                     | ACTUAL SNH_REM_RATE                       | SPO <sub>4</sub> REM_RATE                                           | CO <sub>2</sub> TRAN_RATE(**)                         | S_IC                  | NH <sub>3</sub> TRAN_RATE                             | N <sub>2</sub> O_f | Scenario |
| -                                               | [d] | [-] | [d <sup>-1</sup> ] | [gTSS m <sup>-2</sup> d <sup>-1</sup> ] | [gN-TAN m <sup>-2</sup> d <sup>-1</sup> ] | [gN-TAN m <sup>-2</sup> d <sup>-1</sup> ] | [gP-PO <sub>4</sub> <sup>3-</sup> m <sup>-2</sup> d <sup>-1</sup> ] | [gC-CO <sub>2</sub> m <sup>-3</sup> d <sup>-1</sup> ] | [gC m <sup>-3</sup> ] | [gN-NH <sub>3</sub> m <sup>-2</sup> d <sup>-1</sup> ] | [%]                | n°       |
| k <sub>La</sub> , HRT<br>(C, N, O partitioning) | 10  | 7.5 | 34                 | 11.70                                   | 7.22                                      | 5.44                                      | 0.17                                                                | -2.3                                                  | 2.1                   | -1.78                                                 | 54                 | 1        |
|                                                 | 10  | 7.5 | 0.5                | 13.11                                   | 7.04                                      | 7.01                                      | 0.20                                                                | 1.8                                                   | 9.3                   | -0.03                                                 | 23                 | 2        |
| HRT                                             | 2   | 7.5 | 34                 | 21.05                                   | 24.26                                     | 1.67                                      | 0.27                                                                | 7.69                                                  | 227.47                | -22.59                                                | 0                  | 3        |
|                                                 | 2   | 7   | 34                 | 20.43                                   | 14.33                                     | 1.60                                      | 0.26                                                                | 56.01                                                 | 328.68                | -12.72                                                | 0                  | 3.1      |
|                                                 | 2   | 6.5 | 34                 | 19.85                                   | 8.00                                      | 1.55                                      | 0.26                                                                | 104.27                                                | 428.71                | -6.45                                                 | 0                  | 3.2      |
|                                                 | 5   | 7.5 | 34                 | 17.26                                   | 13.61                                     | 10.76                                     | 0.25                                                                | -20.05                                                | 4.1                   | -2.85                                                 | 42                 | 4        |
|                                                 | 5   | 7.5 | 0.5                | 11.55                                   | 6.67                                      | 6.51                                      | 0.15                                                                | 8.27                                                  | 224                   | -0.16                                                 | 0                  | 4.1      |
|                                                 | 15  | 7.5 | 34                 | 8.38                                    | 4.93                                      | 3.69                                      | 0.13                                                                | 0.63                                                  | 1.70                  | -1.24                                                 | 56                 | 5        |
|                                                 | 20  | 7.5 | 34                 | 6.15                                    | 3.76                                      | 2.80                                      | 0.10                                                                | 0.90                                                  | 1.57                  | -0.95                                                 | 58                 | 6        |
| pH                                              | 5   | 6.5 | 34                 | 16.24                                   | 12.24                                     | 12.24                                     | 0.24                                                                | -22.09                                                | 4.05                  | 0.00                                                  | 32                 | 7        |
|                                                 | 5   | 7   | 34                 | 16.90                                   | 12.42                                     | 12.08                                     | 0.25                                                                | -20.94                                                | 3.37                  | -0.34                                                 | 46                 | 8        |
|                                                 | 5   | 7   | 34                 | 17.40                                   | 37.96                                     | 27.36                                     | 0.24                                                                | -110.01                                               | 144.81                | -10.61                                                | 0                  | 8.1      |
|                                                 | 5   | 8   | 34                 | 17.13                                   | 14.84                                     | 9.35                                      | 0.24                                                                | -20.74                                                | 5.44                  | -5.49                                                 | 36                 | 9        |
|                                                 | 5   | NC  | 34                 | 15.98                                   | 15.15                                     | 8.90                                      | 0.22                                                                | -23.17                                                | 5.80                  | -6.25                                                 | 35                 | 10       |
| TA                                              | 5   | 7.5 | 34                 | 17.54                                   | 16.25                                     | 16.25                                     | 0.27                                                                | 5.89                                                  | 133.16                | 0.00                                                  | 0                  | 11       |
| pH                                              | 10  | 6.5 | 34                 | 11.45                                   | 6.33                                      | 6.33                                      | 0.17                                                                | -3.33                                                 | 1.47                  | 0.00                                                  | 65                 | 12       |
|                                                 | 10  | 7   | 34                 | 11.70                                   | 6.46                                      | 6.21                                      | 0.17                                                                | -2.63                                                 | 1.61                  | -0.25                                                 | 58                 | 13       |
|                                                 | 10  | 8   | 34                 | 11.42                                   | 7.75                                      | 4.85                                      | 0.17                                                                | -3.25                                                 | 2.61                  | -2.90                                                 | 50                 | 14       |
|                                                 | 10  | NC  | 34                 | 7.06                                    | 8.08                                      | 4.04                                      | 0.10                                                                | -13.26                                                | 2.88                  | -4.05                                                 | 51                 | 15       |

(<sup>1</sup>)TA=Total Alkalinity. In this scenario, the concentration of TA (expressed in mol m<sup>-3</sup>) in the influent was increased by 20 mol m<sup>-3</sup>.

(<sup>\*\*</sup>)The CO<sub>2</sub> transfer rate is expressed for unit of volume. To obtain the surface transfer rate, it's sufficient to divide the value for the raceway surface (3.8 m<sup>2</sup>), since the reactor volume was 1 m<sup>3</sup>.

158 **Table SI.10.3.** Simulation results describing the system performances in autumn.

| RESULTS: AUTUMN                                   |     |     |                    |                                         |                                           |                                           |                                                                     |                                                       |                       |                                                       |                    |          |
|---------------------------------------------------|-----|-----|--------------------|-----------------------------------------|-------------------------------------------|-------------------------------------------|---------------------------------------------------------------------|-------------------------------------------------------|-----------------------|-------------------------------------------------------|--------------------|----------|
| Effect tested                                     | HRT | pH  | k <sub>La</sub>    | X_ALG prod                              | APPARENT SNH_REM_RATE                     | ACTUAL SNH_REM_RATE                       | SPO <sub>4</sub> REM_EFF                                            | CO <sub>2</sub> TRAN_RATE(**)                         | S_IC                  | NH <sub>3</sub> TRAN_RATE                             | N <sub>2</sub> O_f | Scenario |
| -                                                 | [d] | [-] | [d <sup>-1</sup> ] | [gTSS m <sup>-2</sup> d <sup>-1</sup> ] | [gN-TAN m <sup>-2</sup> d <sup>-1</sup> ] | [gN-TAN m <sup>-2</sup> d <sup>-1</sup> ] | [gP-PO <sub>4</sub> <sup>3-</sup> m <sup>-2</sup> d <sup>-1</sup> ] | [gC-CO <sub>2</sub> m <sup>-3</sup> d <sup>-1</sup> ] | [gC m <sup>-3</sup> ] | [gN-NH <sub>3</sub> m <sup>-2</sup> d <sup>-1</sup> ] | [%]                | n°       |
| <b>k<sub>La</sub>, HRT (C, N, O partitioning)</b> | 10  | 7.5 | 34                 | 5.96                                    | 6.00                                      | 6.00                                      | 0.09                                                                | -15.7                                                 | 1.8                   | 0                                                     | 49                 | 1        |
|                                                   | 10  | 7.5 | 0.5                | 8.80                                    | 5.58                                      | 5.58                                      | 0.13                                                                | -1.70                                                 | 87.10                 | 0.00                                                  | 0                  | 2        |
| <b>HRT</b>                                        | 2   | 7.5 | 34                 | 7.27                                    | 8.49                                      | 0.80                                      | 0.11                                                                | 37.47                                                 | 335.08                | -7.69                                                 | 0                  | 3        |
|                                                   | 2   | 8   | 34                 | 7.62                                    | 19.98                                     | 0.85                                      | 0.12                                                                | -9.41                                                 | 239.61                | -19.14                                                | 0                  | 3.1      |
|                                                   | 2   | 6.5 | 34                 | 6.12                                    | 0.71                                      | 0.71                                      | 0.10                                                                | 122.99                                                | 510.59                | 0.00                                                  | 0                  | 3.2      |
|                                                   | 5   | 7.5 | 34                 | 8.63                                    | 11.84                                     | 11.84                                     | 0.145                                                               | -37.4                                                 | 4.5                   | 0                                                     | 22                 | 4        |
|                                                   | 5   | 7.5 | 0.5                | 6.21                                    | 3.09                                      | 2.94                                      | 0.08                                                                | 17                                                    | 315.6                 | -0.15                                                 | 0                  | 4.1      |
|                                                   | 15  | 7.5 | 34                 | 4.22                                    | 4.02                                      | 4.02                                      | 0.06                                                                | -10.23                                                | 1.30                  | 0.00                                                  | 100                | 5        |
|                                                   | 20  | 7.5 | 34                 | 2.97                                    | 3.01                                      | 3.01                                      | 0.04                                                                | -7.85                                                 | 1.06                  | 0.00                                                  | 100                | 6        |
| <b>pH</b>                                         | 5   | 6.5 | 34                 | 8.22                                    | 11.79                                     | 11.79                                     | 0.140                                                               | -37.46                                                | 8.19                  | 0.00                                                  | 0                  | 7        |
|                                                   | 5   | 7   | 34                 | 8.57                                    | 11.85                                     | 11.85                                     | 0.144                                                               | -37.68                                                | 4.45                  | 0.00                                                  | 23                 | 8        |
|                                                   | 5   | 8   | 34                 | 8.63                                    | 11.93                                     | 11.75                                     | 0.144                                                               | -37.51                                                | 4.65                  | -0.18                                                 | 21                 | 9        |
|                                                   | 5   | NC  | 34                 | 8.63                                    | 11.93                                     | 11.75                                     | 0.144                                                               | -37.51                                                | 4.65                  | -0.18                                                 | 21                 | 10       |
| <b>TA</b>                                         | 5   | 7.5 | 34                 | 9.01                                    | 16.29                                     | 16.29                                     | 0.16                                                                | -14.45                                                | 110.75                | 0.00                                                  | 0                  | 11       |
| <b>pH</b>                                         | 10  | 6.5 | 34                 | 6.32                                    | 6.03                                      | 6.03                                      | 0.10                                                                | -15.06                                                | 1.79                  | 0.00                                                  | 53                 | 12       |
|                                                   | 10  | 7   | 34                 | 6.33                                    | 6.02                                      | 6.02                                      | 0.10                                                                | -15.08                                                | 1.79                  | 0.00                                                  | 51                 | 13       |
|                                                   | 10  | 8   | 34                 | 4.98                                    | 6.45                                      | 5.46                                      | 0.08                                                                | -18.16                                                | 1.85                  | -0.99                                                 | 42                 | 14       |
|                                                   | 10  | NC  | 34                 | 4.49                                    | 6.51                                      | 5.36                                      | 0.07                                                                | -19.10                                                | 1.84                  | -1.15                                                 | 43                 | 15       |

(\*)TA=Total Alkalinity. In this scenario, the concentration of TA (expressed in mol m<sup>-3</sup>) in the influent was increased by 20 mol m<sup>-3</sup>.  
(\*\*)The CO<sub>2</sub> transfer rate is expressed for unit of volume. To obtain the surface transfer rate, it's sufficient to divide the value for the raceway surface (3.8 m<sup>2</sup>), since the reactor volume was 1 m<sup>3</sup>.

159

160

161 Table SI.10.4. Simulation results describing the system performances in winter.

| RESULTS: WINTER                                    |     |     |                    |                                         |                                           |                                           |                |                                                                     |                                                       |                       |                                                       |                    |          |
|----------------------------------------------------|-----|-----|--------------------|-----------------------------------------|-------------------------------------------|-------------------------------------------|----------------|---------------------------------------------------------------------|-------------------------------------------------------|-----------------------|-------------------------------------------------------|--------------------|----------|
| Effect tested                                      | HRT | pH  | k <sub>la</sub>    | X_ALG<br>prod                           | APPARENT<br>SNH_REM_RATE                  | ACTUAL<br>SNH_REM_RATE                    | SNH<br>REM_EFF | SPO <sub>4</sub><br>REM_EFF                                         | CO <sub>2</sub><br>TRAN_RATE(**)                      | S_IC                  | NH <sub>3</sub><br>TRAN_RATE                          | N <sub>2</sub> O_f | Scenario |
| -                                                  | [d] | [-] | [d <sup>-1</sup> ] | [gTSS m <sup>-2</sup> d <sup>-1</sup> ] | [gN-TAN m <sup>-2</sup> d <sup>-1</sup> ] | [gN-TAN m <sup>-2</sup> d <sup>-1</sup> ] | [%]            | [gP-PO <sub>4</sub> <sup>3-</sup> m <sup>-2</sup> d <sup>-1</sup> ] | [gC-CO <sub>2</sub> m <sup>-3</sup> d <sup>-1</sup> ] | [gC m <sup>-3</sup> ] | [gN-NH <sub>3</sub> m <sup>-2</sup> d <sup>-1</sup> ] | [%]                | n°       |
| k <sub>la</sub> , HRT<br>(C, N, O<br>partitioning) | 10  | 7.5 | 34                 | 6.44                                    | 6.01                                      | 6.01                                      | 73.56          | 0.10                                                                | -14.3                                                 | 2.6                   | 0                                                     | 35                 | 1        |
|                                                    | 10  | 7.5 | 0.5                | 7.15                                    | 3.87                                      | 3.87                                      | 47.37          | 0.10                                                                | 6.10                                                  | 202.10                | 0.00                                                  | 0                  | 2        |
| HRT                                                | 2   | 7.5 | 34                 | 0.00                                    | 3.31                                      | 0.39                                      | 0.96           | 0.03                                                                | 43.97                                                 | 373.69                | -2.92                                                 | 0                  | 3        |
|                                                    | 2   | 6.5 | 34                 | 0.00                                    | 0.38                                      | 0.38                                      | 0.93           | 0.03                                                                | 123.24                                                | 532.14                | 0.00                                                  | 0                  | 3.1      |
|                                                    | 5   | 7.5 | 34                 | 8.41                                    | 10.09                                     | 10.09                                     | 61.75          | 0.145                                                               | -26.1                                                 | 62.1                  | 0.00                                                  | 0                  | 4        |
|                                                    | 5   | 7.5 | 0.5                | 4.48                                    | 1.39                                      | 1.32                                      | 8.08           | 0.06                                                                | 22.2                                                  | 356.7                 | -0.07                                                 | 0                  | 4.1      |
|                                                    | 15  | 7.5 | 34                 | 4.74                                    | 4.04                                      | 4.04                                      | 74.11          | 0.07                                                                | -8.91                                                 | 1.66                  | 0.00                                                  | 64                 | 5        |
|                                                    | 20  | 7.5 | 34                 | 3.60                                    | 3.03                                      | 3.03                                      | 74.30          | 0.06                                                                | -6.32                                                 | 1.31                  | 0.00                                                  | 100                | 6        |
| pH                                                 | 5   | 6.5 | 34                 | 6.72                                    | 0.56                                      | 0.56                                      | 3.42           | 0.09                                                                | 60.85                                                 | 527.22                | 0.00                                                  | 0                  | 7        |
|                                                    | 5   | 7   | 34                 | 6.83                                    | 0.58                                      | 0.58                                      | 3.53           | 0.09                                                                | 43.18                                                 | 439.77                | 0.00                                                  | 0                  | 8        |
|                                                    | 5   | 8   | 34                 | 8.61                                    | 11.44                                     | 10.89                                     | 66.66          | 0.151                                                               | -33.11                                                | 24.10                 | -0.55                                                 | 0                  | 9        |
|                                                    | 5   | NC  | 34                 | 8.61                                    | 11.47                                     | 10.87                                     | 66.54          | 0.151                                                               | -33.15                                                | 23.84                 | -0.60                                                 | 0                  | 10       |
| TA                                                 | 5   | 7.5 | 34                 | 8.43                                    | 10.52                                     | 10.52                                     | 64.37          | 0.15                                                                | 22.93                                                 | 307.87                | 0.00                                                  |                    | 11       |
| pH                                                 | 10  | 6.5 | 34                 | 6.30                                    | 6.01                                      | 6.01                                      | 73.57          | 0.10                                                                | -14.65                                                | 3.23                  | 0.00                                                  | 27                 | 12       |
|                                                    | 10  | 7   | 34                 | 6.49                                    | 6.02                                      | 6.02                                      | 73.65          | 0.10                                                                | -14.33                                                | 2.53                  | 0.00                                                  | 38                 | 13       |
|                                                    | 10  | 8   | 34                 | 6.04                                    | 6.19                                      | 5.78                                      | 70.70          | 0.10                                                                | -15.19                                                | 2.71                  | -0.42                                                 | 33                 | 14       |
|                                                    | 10  | NC  | 34                 | 5.42                                    | 6.46                                      | 5.44                                      | 66.64          | 0.09                                                                | -16.69                                                | 2.90                  | -1.01                                                 | 32                 | 15       |

(\*)TA=Total Alkalinity. In this scenario, the concentration of TA (expressed in mol m<sup>-3</sup>) in the influent was increased by 20 mol m<sup>-3</sup>.

(\*\*)The CO<sub>2</sub> transfer rate is expressed for unit of volume. To obtain the surface transfer rate, it' sufficient to divide the value for the raceway surface (3.8 m<sup>2</sup>), since the reactor volume was 1 m<sup>3</sup>.

162



164 Table SI.11.1. Stoichiometric matrix of the ALBA model (Casagli et al.<sup>1</sup>).

| component<br>j →            |                                                     | $X_{ALG}$<br>gCOD<br>$m^{-3}$ | $X_{AOB}$<br>gCOD<br>$m^{-3}$ | $X_{NOB}$<br>gCOD<br>$m^{-3}$ | $X_{IH}$<br>gCOD<br>$m^{-3}$ | $X_S$<br>gCOD<br>$m^{-3}$ | $X_I$<br>gCOD<br>$m^{-3}$ | $S_S$<br>gCOD<br>$m^{-3}$ | $S_I$<br>gCOD<br>$m^{-3}$ | $S_{IC}$<br>gCm <sup>-3</sup> | $S_{ND}$<br>gNm <sup>-3</sup> | $S_{NH}$<br>gNm <sup>-3</sup> | $S_{NO2}$<br>gNm <sup>-3</sup> | $S_{NO3}$<br>gNm <sup>-3</sup> | $S_{N2}$<br>gNm <sup>-3</sup> | $S_{PO4}$<br>gPm <sup>-3</sup> | $S_{O2}$<br>gO <sub>2</sub> m <sup>-3</sup> | $S_{H2O}$<br>gHm <sup>-3</sup> |
|-----------------------------|-----------------------------------------------------|-------------------------------|-------------------------------|-------------------------------|------------------------------|---------------------------|---------------------------|---------------------------|---------------------------|-------------------------------|-------------------------------|-------------------------------|--------------------------------|--------------------------------|-------------------------------|--------------------------------|---------------------------------------------|--------------------------------|
| process i ↓                 |                                                     |                               |                               |                               |                              |                           |                           |                           |                           |                               |                               |                               |                                |                                |                               |                                |                                             |                                |
| Algae                       |                                                     |                               |                               |                               |                              |                           |                           |                           |                           |                               |                               |                               |                                |                                |                               |                                |                                             |                                |
| 1                           | phototrophic growth on NH <sub>4</sub> <sup>+</sup> | 1                             |                               |                               |                              |                           |                           |                           |                           | $\alpha_{1,9}$                |                               | $\alpha_{1,11}$               |                                |                                |                               | $\alpha_{1,15}$                | 1                                           | $\alpha_{1,17}$                |
| 2                           | phototrophic growth on NO <sub>3</sub> <sup>-</sup> | 1                             |                               |                               |                              |                           |                           |                           |                           | $\alpha_{2,9}$                |                               |                               | $\alpha_{2,13}$                |                                |                               | $\alpha_{2,15}$                | 1                                           | $\alpha_{2,17}$                |
| 3                           | aerobic respiration                                 | -1                            |                               |                               |                              |                           |                           |                           |                           | $\alpha_{3,9}$                |                               | $\alpha_{3,11}$               |                                |                                |                               | $\alpha_{3,15}$                | -1                                          | $\alpha_{3,17}$                |
| 4                           | Decay                                               | -1                            |                               |                               |                              | $\alpha_{4,5}$            | $\alpha_{4,6}$            |                           |                           | $\alpha_{4,9}$                |                               | $\alpha_{4,11}$               |                                |                                |                               | $\alpha_{4,15}$                |                                             |                                |
| Heterotrophic bacteria      |                                                     |                               |                               |                               |                              |                           |                           |                           |                           |                               |                               |                               |                                |                                |                               |                                |                                             |                                |
| 5                           | Aerobic growth on NH <sub>4</sub> <sup>+</sup>      |                               |                               |                               | 1                            |                           |                           | $\alpha_{5,7}$            |                           | $\alpha_{5,9}$                |                               | $\alpha_{5,11}$               |                                |                                |                               | $\alpha_{5,15}$                | $\alpha_{5,16}$                             |                                |
| 6                           | Aerobic growth on NO <sub>3</sub> <sup>-</sup>      |                               |                               |                               | 1                            |                           |                           | $\alpha_{6,7}$            |                           | $\alpha_{6,9}$                |                               |                               | $\alpha_{6,13}$                |                                |                               | $\alpha_{6,15}$                | $\alpha_{6,16}$                             |                                |
| 7                           | Aerobic respiration                                 |                               |                               |                               | -1                           |                           |                           |                           |                           | $\alpha_{7,9}$                |                               | $\alpha_{7,11}$               |                                |                                |                               | $\alpha_{7,15}$                | -1                                          |                                |
| 8                           | Anoxic growth on NO <sub>3</sub> <sup>-</sup>       |                               |                               |                               | 1                            |                           |                           | $\alpha_{8,7}$            |                           | $\alpha_{8,9}$                |                               | $\alpha_{8,11}$               |                                | $\alpha_{8,13}$                | $\alpha_{8,14}$               | $\alpha_{8,15}$                |                                             |                                |
| 9                           | Anoxic growth on NO <sub>2</sub> <sup>-</sup>       |                               |                               |                               | 1                            |                           |                           | $\alpha_{9,7}$            |                           | $\alpha_{9,9}$                |                               | $\alpha_{9,11}$               | $\alpha_{9,12}$                |                                | $\alpha_{9,14}$               | $\alpha_{9,15}$                |                                             |                                |
| 10                          | Anoxic respiration                                  |                               |                               |                               | -1                           |                           |                           |                           |                           | $\alpha_{10,9}$               |                               | $\alpha_{10,11}$              | $\alpha_{10,12}$               | $\alpha_{10,13}$               | $\alpha_{10,14}$              | $\alpha_{10,15}$               |                                             |                                |
| 11                          | Hydrolysis of slowly biodegradable COD              |                               |                               |                               |                              | -1                        |                           | $\alpha_{11,7}$           | $\alpha_{11,8}$           | $\alpha_{11,9}$               |                               | $\alpha_{11,11}$              |                                |                                |                               | $\alpha_{11,15}$               |                                             |                                |
| 12                          | Hydrolysis of urea                                  |                               |                               |                               |                              |                           |                           |                           |                           | $\alpha_{12,9}$               | -1                            | 1                             |                                |                                |                               |                                |                                             | $\alpha_{12,17}$               |
| 13                          | Decay                                               |                               |                               |                               | -1                           | $\alpha_{13,5}$           | $\alpha_{13,6}$           |                           |                           | $\alpha_{13,9}$               |                               | $\alpha_{13,11}$              |                                |                                |                               | $\alpha_{13,15}$               |                                             |                                |
| Ammonium Oxydising Bacteria |                                                     |                               |                               |                               |                              |                           |                           |                           |                           |                               |                               |                               |                                |                                |                               |                                |                                             |                                |
| 14                          | Aerobic growth on NH <sub>4</sub> <sup>+</sup>      |                               | 1                             |                               |                              |                           |                           |                           |                           | $\alpha_{14,9}$               |                               | $\alpha_{14,11}$              | $\alpha_{14,12}$               |                                |                               | $\alpha_{14,15}$               | $\alpha_{14,16}$                            |                                |
| 15                          | Aerobic respiration                                 |                               | -1                            |                               |                              |                           |                           |                           |                           | $\alpha_{15,9}$               |                               | $\alpha_{15,11}$              |                                |                                |                               | $\alpha_{15,15}$               | $\alpha_{15,16}$                            |                                |

|                            |                                   |                                |                            |                            |                            |                             |                             |                            |                             |                 |                  |                  |                  |       |       |                  |                  |      |   |
|----------------------------|-----------------------------------|--------------------------------|----------------------------|----------------------------|----------------------------|-----------------------------|-----------------------------|----------------------------|-----------------------------|-----------------|------------------|------------------|------------------|-------|-------|------------------|------------------|------|---|
| 16                         | Decay                             |                                | -1                         |                            |                            | $\alpha_{16,5}$             | $\alpha_{16,6}$             |                            |                             | $\alpha_{16,9}$ | $\alpha_{16,11}$ |                  |                  |       |       | $\alpha_{16,15}$ |                  |      |   |
| Nitrite Oxydising Bacteria |                                   |                                |                            |                            |                            |                             |                             |                            |                             |                 |                  |                  |                  |       |       |                  |                  |      |   |
| 17                         | Aerobic growth on $\text{NO}_2^-$ |                                | 1                          |                            |                            |                             |                             |                            |                             | $\alpha_{17,9}$ | $\alpha_{17,11}$ | $\alpha_{17,12}$ | $\alpha_{17,13}$ |       |       | $\alpha_{17,15}$ | $\alpha_{17,16}$ |      |   |
| 18                         | Aerobic respiration               |                                | -1                         |                            |                            |                             |                             |                            |                             | $\alpha_{18,9}$ | $\alpha_{18,11}$ |                  |                  |       |       | $\alpha_{18,15}$ | $\alpha_{18,16}$ |      |   |
| 19                         | Decay                             |                                | -1                         |                            |                            | $\alpha_{19,5}$             | $\alpha_{19,6}$             |                            |                             | $\alpha_{19,9}$ | $\alpha_{19,11}$ |                  |                  |       |       | $\alpha_{19,15}$ |                  |      |   |
| Equilibrium phase          |                                   |                                |                            |                            |                            |                             |                             |                            |                             |                 |                  |                  |                  |       |       |                  |                  |      |   |
| 20                         | Dissolution of $\text{O}_2$       |                                |                            |                            |                            |                             |                             |                            |                             |                 |                  |                  |                  |       |       |                  |                  | 1    |   |
| 21                         | Dissolution of $\text{CO}_2$      |                                |                            |                            |                            |                             |                             |                            |                             | 1               |                  |                  |                  |       |       |                  |                  |      |   |
| 22                         | Dissolution of $\text{NH}_3$      |                                |                            |                            |                            |                             |                             |                            |                             |                 |                  | 1                |                  |       |       |                  |                  |      |   |
| k ↓                        | j →                               | Composition matrix             |                            |                            |                            |                             |                             |                            |                             |                 |                  |                  |                  |       |       |                  |                  |      |   |
| 1                          | COD (4 → 19)                      | 1                              | 1                          | 1                          | 1                          | 1                           | 1                           | 1                          | 1                           | 1               | 0                | 0                | 0                | -3.43 | -4.57 | -1.71            | 0                | -1   | 0 |
| 2                          | O (1 → 3)                         | $i_{\text{O}_{\text{BM,ALG}}}$ | $i_{\text{O}_{\text{BM}}}$ | $i_{\text{O}_{\text{BM}}}$ | $i_{\text{O}_{\text{BM}}}$ | $i_{\text{O}_{\text{X}_S}}$ | $i_{\text{O}_{\text{X}_i}}$ | $i_{\text{O}_{\text{SS}}}$ | $i_{\text{O}_{\text{S}_i}}$ | 2.67            | 0.57             | 0                | 2.28             | 3.43  | 0     | 2.07             | 1                | 7.94 |   |
| 3                          | C                                 | $i_{\text{C}_{\text{BM,ALG}}}$ | $i_{\text{C}_{\text{BM}}}$ | $i_{\text{C}_{\text{BM}}}$ | $i_{\text{C}_{\text{BM}}}$ | $i_{\text{C}_{\text{X}_S}}$ | $i_{\text{C}_{\text{X}_i}}$ | $i_{\text{C}_{\text{SS}}}$ | $i_{\text{C}_{\text{S}_i}}$ | 1               | 0.43             | 0                | 0                | 0     | 0     | 0                | 0                | 0    |   |
| 4                          | N                                 | $i_{\text{N}_{\text{BM,ALG}}}$ | $i_{\text{N}_{\text{BM}}}$ | $i_{\text{N}_{\text{BM}}}$ | $i_{\text{N}_{\text{BM}}}$ | $i_{\text{N}_{\text{X}_S}}$ | $i_{\text{N}_{\text{X}_i}}$ | $i_{\text{N}_{\text{SS}}}$ | $i_{\text{N}_{\text{S}_i}}$ | 0               | 1                | 1                | 1                | 1     | 1     | 0                | 0                | 0    |   |
| 5                          | P                                 | $i_{\text{P}_{\text{BM,ALG}}}$ | $i_{\text{P}_{\text{BM}}}$ | $i_{\text{P}_{\text{BM}}}$ | $i_{\text{P}_{\text{BM}}}$ | $i_{\text{P}_{\text{X}_S}}$ | $i_{\text{P}_{\text{X}_i}}$ | $i_{\text{P}_{\text{SS}}}$ | $i_{\text{P}_{\text{S}_i}}$ | 0               | 0                | 0                | 0                | 0     | 0     | 1                | 0                | 0    |   |
| 6                          | H (1 → 3)                         | $i_{\text{H}_{\text{BM,ALG}}}$ | $i_{\text{H}_{\text{BM}}}$ | $i_{\text{H}_{\text{BM}}}$ | $i_{\text{H}_{\text{BM}}}$ | 0                           | 0                           | 0                          | 0                           | 0               | 0.14             | 0.22             | 0.07             | 0.07  | 0     | 0.10             | 0                | 1    |   |

165

166

167 **Table SI.11.2.** Stoichiometric coefficient values in the ALBA model (Casagli et al.<sup>1</sup>).

| Symbol           | Definition                                                             | Value | Unit                       | Source |
|------------------|------------------------------------------------------------------------|-------|----------------------------|--------|
| ALGAE - BACTERIA |                                                                        |       |                            |        |
| $f_{XI,ALG}$     | Inert organic fraction produced from microalgae decay                  | 0.062 | $gCOD_{XI} gCOD_{BM}^{-1}$ | 1      |
| $i_{C,BM}^{ALG}$ | Fraction of carbon in algae biomass                                    | 0.327 | $gC gCOD_{BM}^{-1}$        | 1      |
| $i_{N,BM}^{ALG}$ | Fraction of nitrogen in algae biomass                                  | 0.042 | $gN gCOD_{BM}^{-1}$        | 1      |
| $i_{P,BM}^{ALG}$ | Fraction of phosphorus in algae biomass                                | 0.008 | $gP gCOD_{BM}^{-1}$        | 1      |
| $i_{O,BM}^{ALG}$ | Fraction of oxygen in algae biomass                                    | 0.209 | $gO gCOD_{BM}^{-1}$        | 1      |
| $i_{H,BM}^{ALG}$ | Fraction of hydrogen in algae biomass                                  | 0.050 | $gH gCOD_{BM}^{-1}$        | 1      |
| $f_{SI}$         | Inert soluble organic fraction produced from hydrolysis                | 0.1   | $gCOD_{SI} gCOD_{BM}^{-1}$ | 4      |
| $f_{XI}$         | Inert organic fraction produced from bacteria decay                    | 0.1   | $gCOD_{XI} gCOD_{BM}^{-1}$ | 4      |
| $i_{C,BM}$       | Fraction of carbon in bacterial biomass (nitrifiers, heterotrophs)     | 0.36  | $gC gCOD_{BM}^{-1}$        | 1      |
| $i_{N,BM}$       | Fraction of nitrogen in bacterial biomass (nitrifiers, heterotrophs)   | 0.084 | $gN gCOD_{BM}^{-1}$        | 1      |
| $i_{P,BM}$       | Fraction of phosphorus in bacterial biomass (nitrifiers, heterotrophs) | 0.016 | $gP gCOD_{BM}^{-1}$        | 1      |
| $i_{O,BM}$       | Fraction of oxygen in bacterial biomass (nitrifiers, heterotrophs)     | 0.184 | $gO gCOD_{BM}^{-1}$        | 1      |
| $i_{H,BM}$       | Fraction of hydrogen in bacterial biomass (nitrifiers, heterotrophs)   | 0.043 | $gH gCOD_{BM}^{-1}$        | 1      |
| $i_{C,SS}$       | Fraction of carbon in soluble organic matter (SS)                      | 0.318 | $gC gCOD_{SS}^{-1}$        | 5      |
| $i_{N,SS}$       | Fraction of nitrogen in soluble organic matter (SS)                    | 0.015 | $gN gCOD_{SS}^{-1}$        | 1      |
| $i_{P,SS}$       | Fraction of phosphorus in soluble organic matter (SS)                  | 0.005 | $gP gCOD_{SS}^{-1}$        | 5      |
| $i_{O,SS}$       | Fraction of oxygen in soluble organic matter (SS)                      | 0.156 | $gO gCOD_{SS}^{-1}$        | 5      |
| $i_{C,SI}$       | Fraction of carbon in soluble recalcitrant organic matter (SI)         | 0.36  | $gC gCOD_{SI}^{-1}$        | 5      |
| $i_{N,SI}$       | Fraction of nitrogen in soluble recalcitrant organic matter (SI)       | 0.06  | $gN gCOD_{SI}^{-1}$        | 5      |
| $i_{P,SI}$       | Fraction of phosphorus in soluble recalcitrant organic matter (SI)     | 0.005 | $gP gCOD_{SI}^{-1}$        | 5      |
| $i_{O,SI}$       | Fraction of oxygen in soluble recalcitrant organic matter (SI)         | 0.15  | $gO gCOD_{SI}^{-1}$        | 5      |
| $Y_H$            | Growth yield for heterotrophic bacteria                                | 0.63  | $gCOD_{BM} gCOD_{SS}^{-1}$ | 4      |
| $Y_{H,NO_2}$     | Growth yield for heterotrophic bacteria, denitrification on $NO_2^-$   | 0.3   | $gCOD_{BM} gCOD_{SS}^{-1}$ | 5      |
| $Y_{H,NO_3}$     | Growth yield for heterotrophic bacteria, denitrification on $NO_3^-$   | 0.5   | $gCOD_{BM} gCOD_{SS}^{-1}$ | 5      |
| $Y_{AOB}$        | Growth yield factor for AOB                                            | 0.2   | $gCOD_{BM} gN^{-1}$        | 6      |
| $Y_{NOB}$        | Growth yield for NOB                                                   | 0.05  | $gCOD_{BM} gN^{-1}$        | 6      |
| $i_{C,ND}$       | Fraction of inorganic carbon from urea hydrolysis ( $S_{ND}$ )         | 0.429 | $gC gN_{urea}^{-1}$        | 1      |
| $i_{H,ND}$       | Fraction of hydrogen from urea hydrolysis ( $S_{ND}$ )                 | 0.072 | $gH gN_{urea}^{-1}$        | 1      |
| $i_{C,XS}$       | Fraction of carbon in particulate biodegradable organic matter         | 0.318 | $gC gCOD_{XS}^{-1}$        | 5      |
| $i_{C,XI}$       | Fraction of carbon in particulate inert organic matter                 | 0.36  | $gC gCOD_{XI}^{-1}$        | 7      |

|            |                                                                    |       |                            |   |
|------------|--------------------------------------------------------------------|-------|----------------------------|---|
| $i_{N,XS}$ | Fraction nitrogen in particulate biodegradable organic matter      | 0.034 | $\text{gN gCOD}_{XS}^{-1}$ | 5 |
| $i_{N,XI}$ | Fraction of nitrogen in particulate inert organic matter           | 0.06  | $\text{gN gCOD}_{XI}^{-1}$ | 7 |
| $i_{P,XS}$ | Fraction of phosphorus in particulate biodegradable organic matter | 0.005 | $\text{gP gCOD}_{XS}^{-1}$ | 5 |
| $i_{P,XI}$ | Fraction of phosphorus in particulate inert organic matter         | 0.01  | $\text{gP gCOD}_{XI}^{-1}$ | 4 |
| $i_{O,XS}$ | Fraction of oxygen in particulate biodegradable organic matter     | 0.156 | $\text{gO gCOD}_{XS}^{-1}$ | 5 |
| $i_{O,XI}$ | Fraction of oxygen in particulate inert organic matter             | 0.15  | $\text{gO gCOD}_{XI}^{-1}$ | 5 |

---

168

169

170 Table SI.11.3. Stoichiometric coefficient expressions in the ALBA model (Casagli et al.<sup>1</sup>).

| Stoichiometric coefficients                    |                   |                                                                                                                    |                         |
|------------------------------------------------|-------------------|--------------------------------------------------------------------------------------------------------------------|-------------------------|
| Symbol                                         | Affected variable | Expression                                                                                                         | Unit                    |
| $\rho_1$ - Growth of $X_{ALG}$ on $NH_4^+$     |                   |                                                                                                                    |                         |
| $\alpha_{1,1}$                                 | $X_{ALG}$         | 1                                                                                                                  | $gCOD_{BM} / gCOD_{BM}$ |
| $\alpha_{1,9}$                                 | $S_{IC}$          | $-iC_{,BM}^{ALG}$                                                                                                  | $gC/gCOD_{BM}$          |
| $\alpha_{1,11}$                                | $S_{NH}$          | $-iN_{,BM}^{ALG}$                                                                                                  | $gN/gCOD_{BM}$          |
| $\alpha_{1,15}$                                | $S_{PO4}$         | $-iP_{,BM}^{ALG}$                                                                                                  | $gP/gCOD_{BM}$          |
| $\alpha_{1,16}$                                | $S_{O2}$          | $-iO_{,BM}^{ALG} + (32/12)iC_{,BM}^{ALG} - (24/14)iN_{,BM}^{ALG}$<br>$+ (40/31)iP_{,BM}^{ALG} + (8)iH_{,BM}^{ALG}$ | $gO_2/gCOD_{BM}$        |
| $\alpha_{1,17}$                                | $S_{H2O}$         | -0.0404                                                                                                            | $gH/gCOD_{BM}$          |
| $\rho_2$ - Growth of $X_{ALG}$ on $NO_3^-$     |                   |                                                                                                                    |                         |
| $\alpha_{2,1}$                                 | $X_{ALG}$         | 1                                                                                                                  | $gCOD_{BM} / gCOD_{BM}$ |
| $\alpha_{2,9}$                                 | $S_{IC}$          | $-iC_{,BM}^{ALG}$                                                                                                  | $gC/gCOD_{BM}$          |
| $\alpha_{2,13}$                                | $S_{NO3}$         | $-iN_{,BM}^{ALG}$                                                                                                  | $gN/gCOD_{BM}$          |
| $\alpha_{2,15}$                                | $S_{PO4}$         | $-iP_{,BM}^{ALG}$                                                                                                  | $gP/gCOD_{BM}$          |
| $\alpha_{2,16}$                                | $S_{O2}$          | $-iO_{,BM}^{ALG} + (32/12)iC_{,BM}^{ALG} + (40/14)iN_{,BM}^{ALG}$<br>$+ (40/31)iP_{,BM}^{ALG} + (8)iH_{,BM}^{ALG}$ | $gO/gCOD_{BM}$          |
| $\alpha_{2,17}$                                | $S_{H2O}$         | -0.0464                                                                                                            | $gH/gCOD_{BM}$          |
| $\rho_3$ - Aerobic respiration of $X_{ALG}$    |                   |                                                                                                                    |                         |
| $\alpha_{3,1}$                                 | $X_{ALG}$         | -1                                                                                                                 | $gCOD_{BM} / gCOD_{BM}$ |
| $\alpha_{3,9}$                                 | $S_{IC}$          | $iC_{,BM}^{ALG}$                                                                                                   | $gC/gCOD_{BM}$          |
| $\alpha_{3,11}$                                | $S_{NH}$          | $iN_{,BM}^{ALG}$                                                                                                   | $gN/gCOD_{BM}$          |
| $\alpha_{3,15}$                                | $S_{PO4}$         | $iP_{,BM}^{ALG}$                                                                                                   | $gP/gCOD_{BM}$          |
| $\alpha_{3,16}$                                | $S_{O2}$          | $iO_{,BM}^{ALG} - (32/12)iC_{,BM}^{ALG} + (24/14)iN_{,BM}^{ALG}$<br>$- (40/31)iP_{,BM}^{ALG} - (8)iH_{,BM}^{ALG}$  | $gO_2/gCOD_{BM}$        |
| $\alpha_{3,17}$                                | $S_{H2O}$         | 0.0404                                                                                                             | $gH/gCOD_{BM}$          |
| $\rho_4$ - Decay of $X_{ALG}$                  |                   |                                                                                                                    |                         |
| $\alpha_{4,1}$                                 | $X_{ALG}$         | -1                                                                                                                 | $gCOD_{BM} / gCOD_{BM}$ |
| $\alpha_{4,5}$                                 | $X_S$             | $(1 - f_{XI,ALG})$                                                                                                 | $gCOD_{XS} / gCOD_{BM}$ |
| $\alpha_{4,6}$                                 | $X_I$             | $f_{XI,ALG}$                                                                                                       |                         |
| $\alpha_{4,9}$                                 | $S_{IC}$          | $iC_{,BM}^{ALG} - (1 - f_{XI,ALG}) * iC_{XS} - f_{XI,ALG} * iC_{XI}$                                               | $gC/gCOD_{BM}$          |
| $\alpha_{4,11}$                                | $S_{NH}$          | $iN_{,BM}^{ALG} - (1 - f_{XI,ALG}) * iN_{XS} - f_{XI,ALG} * iN_{XI}$                                               | $gN/gCOD_{BM}$          |
| $\alpha_{4,15}$                                | $S_{PO4}$         | $iP_{,BM}^{ALG} - (1 - f_{XI,ALG}) * iP_{XS} - f_{XI,ALG} * iP_{XI}$                                               | $gP/gCOD_{BM}$          |
| $\rho_5$ - Aerobic growth of $X_H$ on $NH_4^+$ |                   |                                                                                                                    |                         |
| $\alpha_{5,3}$                                 | $X_H$             | 1                                                                                                                  | $gCOD_{BM} / gCOD_{BM}$ |
| $\alpha_{5,7}$                                 | $S_S$             | $-1/Y_H$                                                                                                           | $gCOD_{SS} / gCOD_{BM}$ |
| $\alpha_{5,9}$                                 | $S_{IC}$          | $iC_{SS}/Y_H - iC_{BM}$                                                                                            | $gC/gCOD_{BM}$          |
| $\alpha_{5,11}$                                | $S_{NH}$          | $iN_{SS}/Y_H - iN_{BM}$                                                                                            | $gN/gCOD_{BM}$          |
| $\alpha_{5,15}$                                | $S_{PO4}$         | $iP_{SS}/Y_H - iP_{BM}$                                                                                            | $gP/gCOD_{BM}$          |
| $\alpha_{5,16}$                                | $S_{O2}$          | $-(1/Y_H - 1)$                                                                                                     | $gO_2/gCOD_{BM}$        |
| $\rho_6$ - Aerobic growth of $X_H$ on $NO_3^-$ |                   |                                                                                                                    |                         |
| $\alpha_{6,4}$                                 | $X_H$             | 1                                                                                                                  | $gCOD_{BM} / gCOD_{BM}$ |
| $\alpha_{6,7}$                                 | $S_S$             | $-1/Y_H$                                                                                                           | $gCOD_{SS} / gCOD_{BM}$ |

|                                                                    |           |                                                       |                            |
|--------------------------------------------------------------------|-----------|-------------------------------------------------------|----------------------------|
| $\alpha_{6,9}$                                                     | $S_{IC}$  | $iC_{SS}/Y_H - iC_{BM}$                               | $gC / gCOD_{BM}$           |
| $\alpha_{6,13}$                                                    | $S_{NO3}$ | $iN_{SS}/Y_H - iN_{BM}$                               | $gN / gCOD_{BM}$           |
| $\alpha_{6,15}$                                                    | $S_{PO4}$ | $iP_{SS}/Y_H - iP_{BM}$                               | $gP / gCOD_{BM}$           |
| $\alpha_{6,16}$                                                    | $S_{O2}$  | $-(1/Y_H - 1) - 64/14 * (iN_{SS}/Y_H - iN_{BM})$      | $gO_2 / gCOD_{BM}$         |
| $\rho_7$ – Aerobic respiration of $X_H$                            |           |                                                       |                            |
| $\alpha_{7,4}$                                                     | $X_H$     | -1                                                    | $gCOD_{BM} / gCOD_{BM}$    |
| $\alpha_{7,9}$                                                     | $S_{IC}$  | $iC_{BM}$                                             | $gC / gCOD_{BM}$           |
| $\alpha_{7,11}$                                                    | $S_{NH}$  | $iN_{BM}$                                             | $gN / gCOD_{BM}$           |
| $\alpha_{7,15}$                                                    | $S_{PO4}$ | $iP_{BM}$                                             | $gP / gCOD_{BM}$           |
| $\alpha_{7,16}$                                                    | $S_{O2}$  | -1                                                    | $gO_2 / gCOD_{BM}$         |
| $\rho_8$ – Anoxic growth of $X_H$ on $NO_3^-$                      |           |                                                       |                            |
| $\alpha_{8,4}$                                                     | $X_H$     | 1                                                     | $gCOD_{BM} / gCOD_{BM}$    |
| $\alpha_{8,7}$                                                     | $S_S$     | $-1/Y_{HNO3}$                                         | $gCOD_{SS} / gCOD_{BM}$    |
| $\alpha_{8,9}$                                                     | $S_{IC}$  | $iC_{SS}/Y_{HNO3} - iC_{BM}$                          | $gC / gCOD_{BM}$           |
| $\alpha_{8,11}$                                                    | $S_{NH}$  | $iN_{SS}/Y_{HNO3} - iN_{BM}$                          | $gN / gCOD_{BM}$           |
| $\alpha_{8,13}$                                                    | $S_{NO3}$ | $-28/80 * (1/Y_{HNO3} - 1)$                           | $gN / gCOD_{BM}$           |
| $\alpha_{8,14}$                                                    | $S_{N2}$  | $28/80 * (1/Y_{HNO3} - 1)$                            | $gN / gCOD_{BM}$           |
| $\alpha_{8,15}$                                                    | $S_{PO4}$ | $iP_{SS}/Y_{HNO3} - iP_{BM}$                          | $gP / gCOD_{BM}$           |
| $\rho_9$ – Anoxic growth of $X_H$ on $NO_2^-$                      |           |                                                       |                            |
| $\alpha_{9,4}$                                                     | $X_H$     | 1                                                     | $gCOD_{BM} / gCOD_{BM}$    |
| $\alpha_{9,7}$                                                     | $S_S$     | $-1/Y_{HNO2}$                                         | $gCOD_{SS} / gCOD_{BM}$    |
| $\alpha_{9,9}$                                                     | $S_{IC}$  | $iC_{SS}/Y_{HNO2} - iC_{BM}$                          | $gC / gCOD_{BM}$           |
| $\alpha_{9,11}$                                                    | $S_{NH}$  | $iN_{SS}/Y_{HNO2} - iN_{BM}$                          | $gN / gCOD_{BM}$           |
| $\alpha_{9,12}$                                                    | $S_{NO2}$ | $-28/48 * (1/Y_{HNO2} - 1)$                           | $gN / gCOD_{BM}$           |
| $\alpha_{9,14}$                                                    | $S_{N2}$  | $28/48 * (1/Y_{HNO2} - 1)$                            | $gN / gCOD_{BM}$           |
| $\alpha_{9,15}$                                                    | $S_{PO4}$ | $iP_{SS}/Y_{HNO2} - iP_{BM}$                          | $gP / gCOD_{BM}$           |
| $\rho_{10}$ – Anoxic respiration of $X_H$ on $NO_2^-$ and $NO_3^-$ |           |                                                       |                            |
| $\alpha_{10,4}$                                                    | $X_H$     | -1                                                    | $gCOD_{BM} / gCOD_{BM}$    |
| $\alpha_{10,9}$                                                    | $S_{IC}$  | $iC_{BM}$                                             | $gC / gCOD_{BM}$           |
| $\alpha_{10,11}$                                                   | $S_{NH}$  | $iN_{BM}$                                             | $gN / gCOD_{BM}$           |
| $\alpha_{10,12}$                                                   | $S_{NO2}$ | -14/64                                                | $gN / gCOD_{BM}$           |
| $\alpha_{10,13}$                                                   | $S_{NO3}$ | -14/64                                                | $gN / gCOD_{BM}$           |
| $\alpha_{10,14}$                                                   | $S_{N2}$  | 28/64                                                 | $gN / gCOD_{BM}$           |
| $\alpha_{10,15}$                                                   | $S_{PO4}$ | $iP_{BM}$                                             | $gP / gCOD_{BM}$           |
| $\rho_{11}$ – Hydrolysis of slowly biodegradable COD               |           |                                                       |                            |
| $\alpha_{11,5}$                                                    | $X_S$     | 1                                                     | $gCOD_{XS} / gCOD_{XS}$    |
| $\alpha_{11,7}$                                                    | $S_S$     | $1 - f_{SI}$                                          | $gCOD_{SS} / gCOD_{XS}$    |
| $\alpha_{11,8}$                                                    | $S_I$     | $f_{SI}$                                              | $gCOD_{SI} / gCOD_{XS}$    |
| $\alpha_{11,9}$                                                    | $S_{IC}$  | $iC_{XS} - (1 - f_{SI}) * iC_{SS} - f_{SI} * iC_{SI}$ | $gC / gCOD_{XS}$           |
| $\alpha_{11,11}$                                                   | $S_{NH}$  | $iN_{XS} - (1 - f_{SI}) * iN_{SS} - f_{SI} * iN_{SI}$ | $gN / gCOD_{XS}$           |
| $\alpha_{11,15}$                                                   | $S_{PO4}$ | $iP_{XS} - (1 - f_{SI}) * iP_{SS} - f_{SI} * iP_{SI}$ | $gP / gCOD_{XS}$           |
| $\rho_{12}$ – Hydrolysis of urea                                   |           |                                                       |                            |
| $\alpha_{12,9}$                                                    | $S_{IC}$  | $iC_{ND}$                                             | $gC / gN_{urea}$           |
| $\alpha_{12,10}$                                                   | $S_{ND}$  | -1                                                    | $gN_{urea} / gN_{urea}$    |
| $\alpha_{12,11}$                                                   | $S_{NH}$  | 1                                                     | $gN_{ammonia} / gN_{urea}$ |
| $\alpha_{12,17}$                                                   | $S_{H2O}$ | $iH_{ND}$                                             | $gH / gN_{urea}$           |
| $\rho_{13}$ – Decay of $X_H$                                       |           |                                                       |                            |

|                                                       |           |                                                 |                          |
|-------------------------------------------------------|-----------|-------------------------------------------------|--------------------------|
| $\alpha_{13,4}$                                       | $X_H$     | -1                                              | $gCOD_{BM} / gCOD_{BM}$  |
| $\alpha_{13,5}$                                       | $X_S$     | $1-f_{XI}$                                      | $gCOD_{,XS} / gCOD_{BM}$ |
| $\alpha_{13,6}$                                       | $X_I$     | $f_{XI}$                                        | $gCOD_{,XI} / gCOD_{BM}$ |
| $\alpha_{13,9}$                                       | $S_{IC}$  | $iC_{BM}-(1-f_{XI}) * iC_{XS}-f_{XI} * iC_{XI}$ | $gC / gCOD_{BM}$         |
| $\alpha_{13,11}$                                      | $S_{NH}$  | $iN_{BM}-(1-f_{XI}) * iN_{XS}-f_{XI} * iN_{XI}$ | $gN / gCOD_{BM}$         |
| $\alpha_{13,15}$                                      | $S_{PO4}$ | $iP_{BM}-(1-f_{XI}) * iP_{XS}-f_{XI} * iP_{XI}$ | $gP / gCOD_{BM}$         |
| $\rho_{14}$ – Aerobic growth of $X_{AOB}$ on $NH_4^+$ |           |                                                 |                          |
| $\alpha_{14,2}$                                       | $X_{AOB}$ | 1                                               | $gCOD_{BM} / gCOD_{BM}$  |
| $\alpha_{14,9}$                                       | $S_{IC}$  | $-iC_{BM}$                                      | $gC / gCOD_{BM}$         |
| $\alpha_{14,11}$                                      | $S_{NH}$  | $-iN_{BM}-1/Y_{AOB}$                            | $gN / gCOD_{BM}$         |
| $\alpha_{14,12}$                                      | $S_{NO2}$ | $1/Y_{AOB}$                                     | $gN / gCOD_{BM}$         |
| $\alpha_{14,15}$                                      | $S_{PO4}$ | $-iP_{BM}$                                      | $gP / gCOD_{BM}$         |
| $\alpha_{14,16}$                                      | $S_{O2}$  | $1-48/14 * 1/Y_{AOB}$                           | $gO_2 / gCOD_{BM}$       |
| $\rho_{15}$ – Aerobic respiration of $X_{AOB}$        |           |                                                 |                          |
| $\alpha_{15,2}$                                       | $X_{AOB}$ | -1                                              | $gCOD_{BM} / gCOD_{BM}$  |
| $\alpha_{15,9}$                                       | $S_{IC}$  | $iC_{BM}$                                       | $gC / gCOD_{BM}$         |
| $\alpha_{15,11}$                                      | $S_{NH}$  | $iN_{BM}$                                       | $gN / gCOD_{BM}$         |
| $\alpha_{15,15}$                                      | $S_{PO4}$ | $iP_{BM}$                                       | $gP / gCOD_{BM}$         |
| $\alpha_{15,16}$                                      | $S_{O2}$  | -1                                              | $gO_2 / gCOD_{BM}$       |
| $\rho_{16}$ – Decay of $X_{AOB}$                      |           |                                                 |                          |
| $\alpha_{16,2}$                                       | $X_{AOB}$ | -1                                              | $gCOD_{BM} / gCOD_{BM}$  |
| $\alpha_{16,5}$                                       | $X_S$     | $1-f_{XI}$                                      | $gCOD_{,XS} / gCOD_{BM}$ |
| $\alpha_{16,6}$                                       | $X_I$     | $f_{XI}$                                        | $gCOD_{,XI} / gCOD_{BM}$ |
| $\alpha_{16,9}$                                       | $S_{IC}$  | $iC_{BM}-(1-f_{XI}) * iC_{XS}-f_{XI} * iC_{XI}$ | $gC / gCOD_{BM}$         |
| $\alpha_{16,11}$                                      | $S_{NH}$  | $iN_{BM}-(1-f_{XI}) * iN_{XS}-f_{XI} * iN_{XI}$ | $gN / gCOD_{BM}$         |
| $\alpha_{16,15}$                                      | $S_{PO4}$ | $iP_{BM}-(1-f_{XI}) * iP_{XS}-f_{XI} * iP_{XI}$ | $gCOD_{,XS} / gCOD_{BM}$ |
| $\rho_{17}$ – Aerobic growth of $X_{NOB}$ on $NO_3^-$ |           |                                                 |                          |
| $\alpha_{17,3}$                                       | $X_{NOB}$ | 1                                               | $gCOD_{BM} / gCOD_{BM}$  |
| $\alpha_{17,9}$                                       | $S_{IC}$  | $-iC_{BM}$                                      | $gC / gCOD_{BM}$         |
| $\alpha_{17,11}$                                      | $S_{NH}$  | $-iN_{BM}$                                      | $gN / gCOD_{BM}$         |
| $\alpha_{17,12}$                                      | $S_{NO2}$ | $-1/Y_{NOB}$                                    | $gN / gCOD_{BM}$         |
| $\alpha_{17,13}$                                      | $S_{NO3}$ | $1/Y_{NOB}$                                     | $gN / gCOD_{BM}$         |
| $\alpha_{17,15}$                                      | $S_{PO4}$ | $-iP_{BM}$                                      | $gP / gCOD_{BM}$         |
| $\alpha_{17,16}$                                      | $S_{O2}$  | $1-16/14 * 1/Y_{NOB}$                           | $gO_2 / gCOD_{BM}$       |
| $\rho_{18}$ – Aerobic respiration of $X_{NOB}$        |           |                                                 |                          |
| $\alpha_{18,3}$                                       | $X_{NOB}$ | -1                                              | $gCOD_{BM} / gCOD_{BM}$  |
| $\alpha_{18,9}$                                       | $S_{IC}$  | $iC_{BM}$                                       | $gC / gCOD_{BM}$         |
| $\alpha_{18,11}$                                      | $S_{NH}$  | $iN_{BM}$                                       | $gN / gCOD_{BM}$         |
| $\alpha_{18,15}$                                      | $S_{PO4}$ | $iP_{BM}$                                       | $gP / gCOD_{BM}$         |
| $\alpha_{18,16}$                                      | $S_{O2}$  | -1                                              | $gO_2 / gCOD_{BM}$       |
| $\rho_{19}$ – Decay of $X_{NOB}$                      |           |                                                 |                          |
| $\alpha_{19,3}$                                       | $X_{NOB}$ | -1                                              | $gCOD_{BM} / gCOD_{BM}$  |
| $\alpha_{19,5}$                                       | $X_S$     | $1-f_{XI}$                                      | $gCOD_{,XS} / gCOD_{BM}$ |
| $\alpha_{19,6}$                                       | $X_I$     | $f_{XI}$                                        | $gCOD_{,XI} / gCOD_{BM}$ |
| $\alpha_{19,9}$                                       | $S_{IC}$  | $iC_{BM}-(1-f_{XI}) * iC_{XS}-f_{XI} * iC_{XI}$ | $gC / gCOD_{BM}$         |
| $\alpha_{19,11}$                                      | $S_{NH}$  | $iN_{BM}-(1-f_{XI}) * iN_{XS}-f_{XI} * iN_{XI}$ | $gN / gCOD_{BM}$         |
| $\alpha_{19,15}$                                      | $S_{PO4}$ | $iP_{BM}-(1-f_{XI}) * iP_{XS}-f_{XI} * iP_{XI}$ | $gP / gCOD_{BM}$         |

|                                              |                 |   |  |     |
|----------------------------------------------|-----------------|---|--|-----|
| $\rho_{20}$ – Dissolution of O <sub>2</sub>  |                 |   |  |     |
| $\alpha_{20,15}$                             | S <sub>O2</sub> | 1 |  | [-] |
| $\rho_{21}$ – Dissolution of CO <sub>2</sub> |                 |   |  |     |
| $\alpha_{21,9}$                              | S <sub>IC</sub> | 1 |  | [-] |
| $\rho_{22}$ – Dissolution of NH <sub>3</sub> |                 |   |  |     |
| $\alpha_{22,11}$                             | S <sub>NH</sub> | 1 |  | [-] |

171

172

173



174 Table SI.11.4. Kinetic parameter values in the ALBA model (Casagli et al.<sup>1</sup>).

| Kinetic parameters      |                                                            |               |                                 |        |
|-------------------------|------------------------------------------------------------|---------------|---------------------------------|--------|
| Symbol                  | Description                                                | Value ± std   | Unit                            | Source |
| <b>Biological model</b> |                                                            |               |                                 |        |
| $\mu_{\max,g,ALG}$      | Maximum specific growth rate of $X_{ALG}$                  | 2.5 ± 0.055   | d <sup>-1</sup>                 | 1      |
| $b_{\max,r,ALG}$        | Specific respiration rate of $X_{ALG}$                     | 0.1           | d <sup>-1</sup>                 | 1      |
| $b_{\max,d,ALG}$        | Specific decay rate of $X_{ALG}$                           | 0.03          | d <sup>-1</sup>                 | 6      |
| $\mu_{\max,g,H}$        | Maximum specific growth rate of $X_H$                      | 6             | d <sup>-1</sup>                 | 4      |
| $b_{\max,r,H}$          | Specific aerobic respiration rate of $X_H$                 | 0.3           | d <sup>-1</sup>                 | 5      |
| $\mu_{Hyd}$             | Hydrolysis rate of slowly biodegradable COD ( $X_S$ )      | 3             | d <sup>-1</sup>                 | 6      |
| $\mu_a$                 | Hydrolysis rate of urea (SND)                              | 0.25          | d <sup>-1</sup>                 | 1      |
| $b_{\max,d,H}$          | Specific decay rate of $X_H$                               | 0.9           | d <sup>-1</sup>                 | 1      |
| $\mu_{\max,g,AOB}$      | Maximum specific aerobic growth rate of $X_{AOB}$          | 0.72 ± 0.0005 | d <sup>-1</sup>                 | 1      |
| $b_{\max,r,AOB}$        | Specific aerobic respiration rate of $X_{AOB}$             | 0.05          | d <sup>-1</sup>                 | 6      |
| $b_{\max,d,AOB}$        | Specific decay rate of $X_{AOB}$                           | 0.1           | d <sup>-1</sup>                 | 8      |
| $\mu_{\max,g,NOB}$      | Maximum specific aerobic growth rate of $X_{NOB}$          | 0.65 ± 0.023  | d <sup>-1</sup>                 | 1      |
| $b_{\max,r,NOB}$        | Specific aerobic respiration rate of $X_{NOB}$             | 0.03          | d <sup>-1</sup>                 | 5      |
| $b_{\max,d,NOB}$        | Specific decay rate of $X_{NOB}$                           | 0.08          | d <sup>-1</sup>                 | 1      |
| $K_{C,ALG}$             | Inorganic carbon half-saturation constant for $X_{ALG}$    | 0.004         | gCm <sup>-3</sup>               | 8      |
| $K_{O,ALG}$             | Oxygen half-saturation constant for $X_{ALG}$              | 0.2           | gO <sub>2</sub> m <sup>-3</sup> | 5      |
| $K_{N,ALG}$             | Ammoniacal nitrogen half-saturation constant for $X_{ALG}$ | 0.1           | gNm <sup>-3</sup>               | 8      |
| $K_{NO3,ALG}$           | Nitrate half-saturation constant for $X_{ALG}$             | 0.3           | gNm <sup>-3</sup>               | 9      |
| $K_{P,ALG}$             | Phosphorus half-saturation constant for $X_{ALG}$          | 0.02          | gNm <sup>-3</sup>               | 9      |
| $EC_{50,O2}$            | Oxygen value associated to 50% algae growth reduction      | 20            | gO <sub>2</sub> m <sup>-3</sup> | 1      |
| $n$                     | Shape parameter associated to the Hill model               | 15            | [-]                             | 1      |
| $K_{S,H}$               | Soluble organic matter half-saturation constant for $X_H$  | 4             | gCODm <sup>-3</sup>             | 10     |
| $K_{O,H}$               | Oxygen half-saturation constant for $X_H$                  | 0.2           | gO <sub>2</sub> m <sup>-3</sup> | 4      |
| $K_{N,H}$               | Ammonium half-saturation constant for $X_H$                | 0.05          | gNm <sup>-3</sup>               | 4      |
| $K_{NO2,H}$             | Nitrite half-saturation constant for $X_H$                 | 0.2           | gNm <sup>-3</sup>               | 5      |
| $K_{NO3,H}$             | Nitrate half-saturation constant for $X_H$                 | 0.5           | gNm <sup>-3</sup>               | 5      |
| $K_{P,H}$               | Phosphorus half-saturation constant for $X_H$              | 0.01          | gPm <sup>-3</sup>               | 4      |
| $K_{HYD}$               | Half saturation constant for hydrolysis                    | 1             | gCODgCOD <sup>-1</sup>          | 5      |
| $K_{C,AOB}$             | Inorganic carbon half-saturation constant for $X_{AOB}$    | 0.5           | gCm <sup>-3</sup>               | 4      |
| $K_{O,AOB}$             | Oxygen half-saturation constant for AOB                    | 0.8           | gO <sub>2</sub> m <sup>-3</sup> | 4      |
| $K_{N,AOB}$             | Ammonium half-saturation constant for $X_{AOB}$            | 0.5           | gNm <sup>-3</sup>               | 5      |
| $K_{P,AOB}$             | Phosphorus half-saturation constant for $X_{AOB}$          | 0.01          | gPm <sup>-3</sup>               | 4      |
| $K_{C,NOB}$             | Inorganic carbon half-saturation constant for $X_{NOB}$    | 0.5           | gCm <sup>-3</sup>               | 4      |

|                  |                                                          |                   |                           |    |
|------------------|----------------------------------------------------------|-------------------|---------------------------|----|
| $K_{O,NOB}$      | Oxygen half-saturation constant for $X_{NOB}$            | 2.2               | $gO_2m^{-3}$              | 11 |
| $K_{NO_2,NOB}$   | Nitrite half-saturation constant for $X_{NOB}$           | 0.5               | $gNm^{-3}$                | 5  |
| $K_{P,NOB}$      | Phosphorus half-saturation constant for $X_{NOB}$        | 0.01              | $gPm^{-3}$                | 4  |
| $\eta_{ANOX}$    | Efficiency reduction factor for denitrification process  | 0.6               | [-]                       | 12 |
| $I_{OPT}$        | Optimal irradiance for $X_{ALG}$                         | $300 \pm 3.814$   | $\mu mol m^{-2} s^{-1}$   | 13 |
| $\alpha$         | Initial slope of irradiance response curve               | $0.01 \pm 0.0003$ | $\mu mol^{-1} m^2 s^{-1}$ | 1  |
| $\epsilon$       | Light extinction coefficient                             | 0.067             | $m^2 g COD^{-1}$          | 1  |
| $\theta$         | Coefficient for temperature dependence for mass transfer | 1.024             | $^{\circ}C^{-1}$          | 14 |
| $\theta_H$       | Temperature coefficient for $X_H$ decay                  | 1.07              | $^{\circ}C^{-1}$          | 4  |
| $\theta_{AOB}$   | Temperature coefficient for $X_{AOB}$ decay              | 1.1               | $^{\circ}C^{-1}$          | 15 |
| $\theta_{NOB}$   | Temperature coefficient for $X_{NOB}$ decay              | 1.04              | $^{\circ}C^{-1}$          | 15 |
| $\theta_{ALG}$   | Temperature coefficient for $X_{ALG}$ decay              | 1.04              | $^{\circ}C^{-1}$          | 5  |
| $\theta_{HYD}$   | Temperature coefficient for hydrolysis                   | $1.04 \pm 0.005$  | $^{\circ}C^{-1}$          | 1  |
| $\theta_{AMM}$   | Temperature coefficient for ammonification               | $1.12 \pm 0.002$  | $^{\circ}C^{-1}$          | 1  |
| $T_{max}^{ALG}$  | Maximum temperature threshold for $X_{ALG}$              | $42 \pm 0.513$    | $^{\circ}C$               | 1  |
| $T_{opt}^{ALG}$  | Optimal temperature for $X_{ALG}$ growth                 | $20 \pm 0.148$    | $^{\circ}C$               | 1  |
| $T_{min}^{ALG}$  | Minimum temperature threshold for $X_{ALG}$              | $-10 \pm 1.524$   | $^{\circ}C$               | 1  |
| $T_{max}^{AOB}$  | Maximum temperature threshold for $X_{AOB}$              | $40 \pm 0.817$    | $^{\circ}C$               | 1  |
| $T_{opt}^{AOB}$  | Optimal temperature for $X_{AOB}$ growth                 | $24.5 \pm 0.232$  | $^{\circ}C$               | 1  |
| $T_{min}^{AOB}$  | Minimum temperature threshold for $X_{AOB}$              | $-8 \pm 0.741$    | $^{\circ}C$               | 1  |
| $T_{max}^{NOB}$  | Maximum temperature threshold for $X_{NOB}$              | $38.5 \pm 6.090$  | $^{\circ}C$               | 1  |
| $T_{opt}^{NOB}$  | Optimal temperature for $X_{NOB}$ growth                 | $20 \pm 0.940$    | $^{\circ}C$               | 1  |
| $T_{min}^{NOB}$  | Minimum temperature threshold for $X_{NOB}$              | $-8 \pm 9.734$    | $^{\circ}C$               | 1  |
| $T_{max}^H$      | Maximum temperature threshold for $X_H$                  | $42 \pm 1.919$    | $^{\circ}C$               | 1  |
| $T_{opt}^H$      | Optimal temperature for $X_H$ growth                     | $25 \pm 0.634$    | $^{\circ}C$               | 1  |
| $T_{min}^H$      | Minimum temperature threshold for $X_H$                  | $-3 \pm 0.335$    | $^{\circ}C$               | 1  |
| $pH_{max}^{ALG}$ | Maximum pH threshold for $X_{ALG}$                       | $12 \pm 0.039$    | -                         | 1  |
| $pH_{opt}^{ALG}$ | Optimal pH for $X_{ALG}$ growth                          | $8.4 \pm 0.066$   | -                         | 1  |
| $pH_{min}^{ALG}$ | Minimum pH threshold for $X_{ALG}$                       | $2 \pm 0.562$     | -                         | 1  |
| $pH_{max}^{AOB}$ | Maximum pH threshold for $X_{AOB}$                       | $12.4 \pm 0.115$  | -                         | 1  |
| $pH_{opt}^{AOB}$ | Optimal pH for $X_{AOB}$ growth                          | $8.1 \pm 0.078$   | -                         | 1  |
| $pH_{min}^{AOB}$ | Minimum pH threshold for $X_{AOB}$                       | $5.8 \pm 0.355$   | -                         | 1  |
| $pH_{max}^{NOB}$ | Maximum pH threshold for $X_{NOB}$                       | $12.1 \pm 0.463$  | -                         | 1  |
| $pH_{opt}^{NOB}$ | Optimal pH for $X_{NOB}$ growth                          | $7.9 \pm 0.320$   | -                         | 1  |
| $pH_{min}^{NOB}$ | Minimum pH threshold for $X_{NOB}$                       | $5 \pm 0.568$     | -                         | 1  |
| $pH_{max}^H$     | Maximum pH threshold for $X_H$                           | $11.5 \pm 0.022$  | -                         | 1  |
| $pH_{opt}^H$     | Optimal pH for $X_H$ growth                              | $7 \pm 0.066$     | -                         | 1  |
| $pH_{min}^H$     | Maximum pH threshold for $X_{ALG}$                       | $2 \pm 0.344$     | -                         | 1  |

Gas-liquid exchange with atmosphere

|                  |                                                  |           |                                                    |    |
|------------------|--------------------------------------------------|-----------|----------------------------------------------------|----|
| K <sub>La</sub>  | Mass transfer coefficient for O <sub>2</sub>     | 34 ± 0.1  | d <sup>-1</sup>                                    | 1  |
| H <sub>O2</sub>  | Henry's constant for O <sub>2</sub>              | Eq(SI6.3) | gO <sub>2</sub> atm <sup>-1</sup> m <sup>-3</sup>  | 16 |
| H <sub>CO2</sub> | Henry's constant for carbon CO <sub>2</sub>      | Eq(SI6.4) | gCO <sub>2</sub> atm <sup>-1</sup> m <sup>-3</sup> | 16 |
| H <sub>NH3</sub> | Henry's constant for NH <sub>3</sub>             | Eq(SI6.5) | gNH <sub>3</sub> atm <sup>-1</sup> m <sup>-3</sup> | 16 |
| D <sub>O2</sub>  | Mass diffusion coefficient for O <sub>2</sub>    | 2.5e-009  | m <sup>2</sup> s <sup>-1</sup>                     | 17 |
| D <sub>CO2</sub> | Mass diffusion coefficient for CO <sub>2</sub>   | 2.1e-009  | m <sup>2</sup> s <sup>-1</sup>                     | 17 |
| D <sub>NH3</sub> | Mass diffusion coefficient for NH <sub>3</sub>   | 2.4e-009  | m <sup>2</sup> s <sup>-1</sup>                     | 17 |
| p <sub>O2</sub>  | Partial pressure of O <sub>2</sub> in gas phase  | 0.21      | atm                                                | 1  |
| p <sub>CO2</sub> | Partial pressure of CO <sub>2</sub> in gas phase | 0.0004    | atm                                                | 1  |
| p <sub>NH3</sub> | Partial pressure of NH <sub>3</sub> in gas phase | 1.5e-006  | atm                                                | 1  |

pH sub-model

|                                  |                                                                                |       |   |   |
|----------------------------------|--------------------------------------------------------------------------------|-------|---|---|
| pK <sub>aCO2</sub>               | Acid dissociation constant for carbonic acid - bicarbonate balance             | 6.37  | - | 7 |
| pK <sub>aHCO3<sup>-</sup></sub>  | Acid dissociation constant for carbonic acid - bicarbonate balance             | 10.33 | - | 7 |
| pK <sub>aNH4<sup>+</sup></sub>   | Acid dissociation constant for bicarbonate-carbonate balance                   | 9.25  | - | 7 |
| pK <sub>aHNO2</sub>              | Acid dissociation constant for ammonia-ammonium balance                        | 3.35  | - | 7 |
| pK <sub>aHNO3</sub>              | Acid dissociation constant for nitrous acid -nitrite balance                   | -1.64 | - | 7 |
| pK <sub>aH3PO4</sub>             | Acid dissociation constant for nitric acid-nitrate balance                     | 2.14  | - | 7 |
| pK <sub>aH2PO4<sup>-</sup></sub> | Acid dissociation constant for phosphoric acid-dihydrogen phosphate balance    | 7.21  | - | 7 |
| pK <sub>aHPO4<sup>2-</sup></sub> | Acid dissociation constant for dihydrogen phosphate-hydrogen phosphate balance | 12.67 | - | 7 |

176 Table SI.11.5. pH sub-model equation system in the ALBA model (Casagli et al.<sup>1</sup>).

| Description                                                       | Expression [mol m <sup>-3</sup> ]                                                                                                                                                                                   | K <sub>A</sub><br>(293 K)<br>[M]   |
|-------------------------------------------------------------------|---------------------------------------------------------------------------------------------------------------------------------------------------------------------------------------------------------------------|------------------------------------|
| 1- Mass balance                                                   | $\frac{S_{NH}}{14} = NH_3 + NH_4^+$                                                                                                                                                                                 |                                    |
| 2 - Dissociation<br>$NH_4^+ \leftrightarrow NH_3 + H^+$           | $NH_4^+ = \left( \frac{S_{NH}/14}{1 + \frac{(K_{aNH4} \cdot 10^3)}{H^+}} \right)$                                                                                                                                   | K <sub>A,NH4</sub> :<br>5.62E-10   |
| 3- Mass balance                                                   | $\frac{S_{NO_2}}{14} = NO_2^- + HNO_2$                                                                                                                                                                              |                                    |
| 4 - Dissociation<br>$HNO_2 \leftrightarrow NO_2^- + H^+$          | $HNO_2 = \left( \frac{S_{NO_2}/14}{1 + \frac{(K_{aNO_2} \cdot 10^3)}{H^+}} \right)$                                                                                                                                 | K <sub>A,HNO2</sub> :<br>4.47E-04  |
| 5- Mass balance                                                   | $\frac{S_{NO_3}}{14} = NO_3^- + HNO_3$                                                                                                                                                                              |                                    |
| 6 - Dissociation<br>$HNO_3 \leftrightarrow NO_3^- + H^+$          | $HNO_3 = \left( \frac{S_{NO_3}/14}{1 + \frac{(K_{aNO_3} \cdot 10^3)}{H^+}} \right)$                                                                                                                                 | K <sub>A,HNO3</sub> :<br>4.37E+01  |
| 7- Mass balance                                                   | $\frac{S_{IC}}{12} = CO_2 + HCO_3^- + CO_3^{2-}$                                                                                                                                                                    |                                    |
| 8 - Dissociation<br>$H_2O + CO_2 \leftrightarrow HCO_3^- + H^+$   | $CO_2 = \frac{S_{IC}/12}{1 + \frac{(K_{aCO_2} \cdot 10^3)}{H^+} + \frac{(K_{aCO_2} \cdot K_{aHCO_3} \cdot 10^6)}{(H^+)^2}}$                                                                                         | K <sub>A,H2CO3</sub> :<br>4.27E-07 |
| 9 - Dissociation<br>$HCO_3^- \leftrightarrow CO_3^{2-} + H^+$     | $HCO_3^- = \left( \frac{S_{IC}/12}{1 + \frac{H^+}{(K_{aCO_2} \cdot 10^3)} + \frac{(K_{aHCO_3} \cdot 10^3)}{H^+}} \right)$                                                                                           | K <sub>A,HCO3</sub> :<br>4.68E-11  |
| 10- Mass balance                                                  | $\frac{S_{PO_4}}{31} = H_3PO_4 + H_2PO_4^- + HPO_4^{2-} + PO_4^{3-}$                                                                                                                                                |                                    |
| 11 - Dissociation<br>$H_3PO_4 \leftrightarrow H_2PO_4^- + H^+$    | $H_3PO_4 = \frac{S_{PO_4}/31}{1 + \frac{(K_{aH3PO_4} \cdot 10^3)}{H^+} + \frac{(K_{aH3PO_4} \cdot K_{aH2PO_4} \cdot 10^6)}{(H^+)^2} + \frac{(K_{aH3PO_4} \cdot K_{aH2PO_4} \cdot K_{aHPO_4} \cdot 10^9)}{(H^+)^3}}$ | K <sub>A,H3PO4</sub> :<br>7.24E-03 |
| 12 - Dissociation<br>$H_2PO_4^- \leftrightarrow HPO_4^{2-} + H^+$ | $H_2PO_4^- = \frac{S_{PO_4}/31}{1 + \frac{H^+}{(K_{aH3PO_4} \cdot 10^3)} + \frac{(K_{aH2PO_4} \cdot 10^3)}{H^+} + \frac{(K_{aH2PO_4} \cdot K_{aHPO_4} \cdot 10^6)}{(H^+)^2}}$                                       | K <sub>A,H2PO4</sub> :<br>6.17E-08 |

|                                                                                        |                                                                                                                                                                                                                                                       |                                   |
|----------------------------------------------------------------------------------------|-------------------------------------------------------------------------------------------------------------------------------------------------------------------------------------------------------------------------------------------------------|-----------------------------------|
| 13 - Dissociation<br>$\text{HPO}_4^{2-} \leftrightarrow \text{PO}_4^{3-} + \text{H}^+$ | $\text{HPO}_4^{2-} = \frac{S_{\text{PO}_4}/31}{1 + \frac{(\text{H}^+)^2}{(K_{\text{AH}_3\text{PO}_4} * K_{\text{aH}_2\text{PO}_4} * 10^6)} + \frac{\text{H}^+}{(K_{\text{aH}_2\text{PO}_4} * 10^3)} + \frac{(K_{\text{aHPO}_4} * 10^3)}{\text{H}^+}}$ | $K_{\text{a,HPO}_4}:$<br>2.14E-13 |
| 14 - Dissociation<br>$\text{H}_2\text{O} \leftrightarrow \text{OH}^- + \text{H}^+$     | $\text{OH}^- = \frac{K_{\text{a,w}} * 10^3}{\text{H}^+}$                                                                                                                                                                                              | $K_{\text{a,w}}:$<br>1.00E-14     |
| 15 - Charge balance                                                                    | $\text{H}^+ + \text{NH}_4^+ + \Delta_{\text{CAT,AN}} - \text{OH}^- - \text{NO}_2^- - \text{NO}_3^- - \text{HCO}_3^- - 2\text{CO}_3^{2-} - \text{H}_2\text{PO}_4^- - 2\text{HPO}_4^{2-} - 3\text{PO}_4^{3-} = 0$                                       | -                                 |

---

177

178 The temperature influence on the dissociation constants ( $k_a$ ) was considered by using the van't Hoff equation:

179 
$$\ln\left(\frac{K_{a,T}}{K_{a,T_{\text{ref}}}}\right) = \frac{\Delta H^\circ}{R} \cdot \left(\frac{1}{T_{\text{ref}}} - \frac{1}{T+273.15}\right) \quad (\text{SI.11.1})$$

180 In Equation SI6.4,  $T_{\text{ref}}$  is the standard temperature (298.15 K) for which the equilibrium coefficient value ( $K_{a,T_{\text{ref}}}$ , [mol L<sup>-1</sup>]) is known, T is the temperature at which evaluate

181 the equilibrium coefficient value ( $K_{a,T}$ , [mol L<sup>-1</sup>]), R is the gas law constant [J K<sup>-1</sup> mol<sup>-1</sup>] and  $\Delta H^\circ$  is the heat of reaction at standard temperature and pressure [J].

182

183 Table SI.11.6. Biological process rates in the ALBA model (Casagli et al.<sup>1</sup>).

| Group                            |                     | Process                      | Rate                                                                                                                                                                                                                                                               |                                                                                                                                                                                                                                  |
|----------------------------------|---------------------|------------------------------|--------------------------------------------------------------------------------------------------------------------------------------------------------------------------------------------------------------------------------------------------------------------|----------------------------------------------------------------------------------------------------------------------------------------------------------------------------------------------------------------------------------|
| Algae ( $X_{ALG}$ )              |                     | $\rho_1$ Growth on $S_{NH}$  | $\mu_{max,g,ALG} \cdot f_I \cdot f_{T,ALG} \cdot f_{pH,ALG} \cdot f_{O_2,g} \cdot \min\left(\frac{S_{IC}}{K_{C,ALG}+S_{IC}}, \frac{S_{NH}}{K_{N,ALG}+S_{NH}}, \frac{S_{PO4}}{K_{P,ALG}+S_{PO4}}\right) \cdot X_{ALG}$                                              |                                                                                                                                                                                                                                  |
|                                  |                     | $\rho_2$ Growth on $S_{NO3}$ | $\mu_{max,g,ALG} \cdot f_I \cdot f_{T,ALG} \cdot f_{pH,ALG} \cdot f_{O_2,g} \cdot \frac{K_{N,ALG}}{K_{N,ALG}+S_{NH}} \cdot \min\left(\frac{S_{IC}}{K_{C,ALG}+S_{IC}}, \frac{S_{NO3}}{K_{NO3,ALG}+S_{NO3}}, \frac{S_{PO4}}{K_{P,ALG}+S_{PO4}}\right) \cdot X_{ALG}$ |                                                                                                                                                                                                                                  |
|                                  |                     | $\rho_3$ Aerobic respiration | $b_{max,r,ALG} \cdot f_{T,ALG} \cdot f_{pH,ALG} \cdot \frac{S_{O2}}{K_{O,ALG}+S_{O2}} \cdot X_{ALG}$                                                                                                                                                               |                                                                                                                                                                                                                                  |
|                                  |                     | $\rho_4$ Decay               | $b_{max,d,ALG} \cdot (\theta_{ALG}^{(T-20)} \cdot f_{pH,ALG} + f_{O_2,d}) \cdot X_{ALG}$                                                                                                                                                                           |                                                                                                                                                                                                                                  |
| Heterotrophic bacteria ( $X_H$ ) | Aerobic             | $\rho_5$ Growth on $S_{NH}$  | $\mu_{max,g,H} \cdot f_{T,H} \cdot f_{pH,H} \cdot \min\left(\frac{S_S}{K_{S,H}+S_S}, \frac{S_{O2}}{K_{O,H}+S_{O2}}, \frac{S_{NH}}{K_{N,H}+S_{NH}}, \frac{S_{PO4}}{K_{P,H}+S_{PO4}}\right) \cdot X_H$                                                               |                                                                                                                                                                                                                                  |
|                                  |                     | $\rho_6$ Growth on $S_{NO3}$ | $\mu_{max,g,H} \cdot f_{T,H} \cdot f_{pH,H} \cdot \frac{K_{N,H}}{K_{N,H}+S_{NH}} \cdot \min\left(\frac{S_S}{K_{S,H}+S_S}, \frac{S_{O2}}{K_{O,H}+S_{O2}}, \frac{S_{NO3}}{K_{NO3,H}+S_{NO3}}, \frac{S_{PO4}}{K_{P,H}+S_{PO4}}\right) \cdot X_H$                      |                                                                                                                                                                                                                                  |
|                                  |                     | $\rho_7$ Respiration         | $b_{max,r,H} \cdot f_{T,H} \cdot f_{pH,H} \cdot \frac{S_{O2}}{K_{O,ALG}+S_{O2}} \cdot X_H$                                                                                                                                                                         |                                                                                                                                                                                                                                  |
|                                  | Anoxic              | $\rho_8$ Growth on $S_{NO2}$ | $\mu_{max,g,H} \cdot \eta_{ANOX} \cdot f_{T,H} \cdot f_{pH,H} \cdot \frac{K_{O,H}}{K_{O,H}+S_{O2}} \cdot \min\left(\frac{S_S}{K_{S,H}+S_S}, \frac{S_{NO2}}{K_{NO2,H}+S_{NO2}}, \frac{S_{PO4}}{K_{P,H}+S_{PO4}}\right) \cdot X_H$                                   |                                                                                                                                                                                                                                  |
|                                  |                     | $\rho_9$ Growth on $S_{NO3}$ | $\mu_{max,g,H} \cdot \eta_{ANOX} \cdot f_{T,H} \cdot f_{pH,H} \cdot \frac{K_{O,H}}{K_{O,H}+S_{O2}} \cdot \min\left(\frac{S_S}{K_{S,H}+S_S}, \frac{S_{NO3}}{K_{NO3,H}+S_{NO3}}, \frac{S_{PO4}}{K_{P,H}+S_{PO4}}\right) \cdot X_H$                                   |                                                                                                                                                                                                                                  |
|                                  |                     | $\rho_{10}$ Respiration      | $b_{max,r,H} \cdot \eta_{ANOX} \cdot f_{T,H} \cdot f_{pH,H} \cdot \frac{K_{O,H}}{K_{NO2,H}+S_{NO2}} \cdot \min\left(\frac{S_{NO2}}{K_{NO2,H}+S_{NO2}}, \frac{S_{NO3}}{K_{NO3,H}+S_{NO3}}\right) \cdot X_H$                                                         |                                                                                                                                                                                                                                  |
|                                  |                     | $\rho_{11}$ Hydrolysis       | $\mu_{Hyd} \cdot \theta_{HYD}^{(T-20)} \cdot f_{pH,Hyd} \cdot \frac{X_S/X_H}{K_{HYD}+(X_S/X_H)} \cdot X_H$                                                                                                                                                         |                                                                                                                                                                                                                                  |
|                                  |                     | $\rho_{12}$ Ammonification   | $\mu_a \cdot \theta_{AMM}^{(T-20)} \cdot f_{pH,a} \cdot \frac{S_{ND}}{K_a+S_{ND}} \cdot X_H$                                                                                                                                                                       |                                                                                                                                                                                                                                  |
|                                  |                     | $\rho_{13}$ Decay            | $b_{max,d,H} \cdot \theta_H^{(T-20)} \cdot f_{pH,H} \cdot X_H$                                                                                                                                                                                                     |                                                                                                                                                                                                                                  |
|                                  | Nitrifying bacteria | $X_{AOB}$                    | Aerobic                                                                                                                                                                                                                                                            | $\rho_{14}$ Growth                                                                                                                                                                                                               |
|                                  |                     |                              | $\rho_{15}$ Respiration                                                                                                                                                                                                                                            | $b_{max,r,AOB} \cdot f_{T,AOB} \cdot f_{pH,AOB} \cdot \frac{S_{O2}}{K_{O,AOB}+S_{O2}} \cdot X_{AOB}$                                                                                                                             |
|                                  |                     |                              | $\rho_{16}$ Decay                                                                                                                                                                                                                                                  | $b_{max,d,AOB} \cdot \theta_{AOB}^{(T-20)} \cdot f_{pH,AOB} \cdot X_{AOB}$                                                                                                                                                       |
| $X_{NOB}$                        |                     | Aerobic                      | $\rho_{17}$ Growth                                                                                                                                                                                                                                                 | $\mu_{max,g,NOB} \cdot f_{T,NOB} \cdot f_{pH,NOB} \cdot \min\left(\frac{S_{NO2}}{K_{NO2,NOB}+S_{NO2}}, \frac{S_{O2}}{K_{O,NOB}+S_{O2}}, \frac{S_{IC}}{K_{C,NOB}+S_{IC}}, \frac{S_{PO4}}{K_{P,NOB}+S_{PO4}}\right) \cdot X_{AOB}$ |
|                                  |                     |                              | $\rho_{18}$ Respiration                                                                                                                                                                                                                                            | $b_{max,r,NOB} \cdot f_{T,NOB} \cdot f_{pH,NOB} \cdot \frac{S_{O2}}{K_{O,NOB}+S_{O2}} \cdot X_{NOB}$                                                                                                                             |
|                                  |                     |                              | $\rho_{19}$ Decay                                                                                                                                                                                                                                                  | $b_{max,d,NOB} \cdot \theta_{NOB}^{(T-20)} \cdot f_{pH,NOB} \cdot X_{NOB}$                                                                                                                                                       |

185 \*  $S_{IC}$  in the Monod terms includes the inorganic carbon from  $CO_2$  and  $HCO_3^-$ , without accounting for the contribution given by  $CO_3^{2-}$ . The concentration of  $CO_2$  and  $HCO_3^-$   
186 is estimated using the pH sub-model, as shown in Table SI.11.5.

187 **Table SI.11.7.** Gas-liquid transfer rates in the ALBA model (Casagli et al.<sup>1</sup>).

| Gas – liquid mass transfer                         |                                                                                                                       |                                         |
|----------------------------------------------------|-----------------------------------------------------------------------------------------------------------------------|-----------------------------------------|
| Process                                            | Description                                                                                                           | Unit                                    |
| $\rho_{20}$ - oxygen stripping/dissolution         | $\theta^{T-20} \cdot kLa \cdot (H_{O_2}(T) \cdot p_{O_2} - S_{O_2})$                                                  | $gO_2 \text{ m}^{-3} \text{ d}^{-1}$    |
| $\rho_{21}$ - carbon dioxide stripping/dissolution | $\theta^{T-20} \cdot kLa \cdot \left(\frac{D_{CO_2}}{D_{O_2}}\right)^{0.5} \cdot (H_{CO_2}(T) \cdot p_{CO_2} - CO_2)$ | $gC-CO_2 \text{ m}^{-3} \text{ d}^{-1}$ |
| $\rho_{22}$ - ammonia stripping                    | $\theta^{T-20} \cdot kLa \cdot \left(\frac{D_{NH_3}}{D_{O_2}}\right)^{0.5} \cdot (H_{NH_3}(T) \cdot p_{NH_3} - NH_3)$ | $gN-NH_3 \text{ m}^{-3} \text{ d}^{-1}$ |

188



## SI.12 Experimental measurement of $k_La$

The volumetric mass transfer coefficient ( $k_La$ ) was estimated according to the ASCE Standard<sup>18</sup>. In brief, the HRABP was filled with clean water, then the water volume was de-oxygenated using reagent-grade chemicals. To this purpose, sodium sulphite ( $Na_2SO_3$ ) was uniformly distributed on the surface of the HRABP, to achieve water de-oxygenation. Then, the water re-oxygenation was monitored until reaching a value close to the DO saturation at the test temperature. DO data were measured using two DO probes (Hach-Lange, LDO101), each connected to a multi-meter data logger (Hach-Lange, HQ40D), recording DO data every 30 s. The DO was measured in two different points of the HRABP channels, i.e. one immediately after the paddlewheel and one at the opposite location of the loop, to account for different mass transfer rates in the two zones<sup>19</sup>. The overall mass transfer coefficient was then calculated by assuming the average value of the two determinations.

The DO data were then analysed to estimate the volumetric mass transfer coefficient ( $k_La$ ), according to the following model:

$$C=C_{\infty}^{*}-(C_{\infty}^{*}-C_0)\exp(-k_La*t)$$

Where:  $C$  is the DO concentration [ $g\ m^{-3}$ ],  $C_{\infty}^{*}$  is the steady-state DO saturation concentration as time approaches infinity [ $g\ m^{-3}$ ],  $C_0$  is the initial DO concentration at time zero [ $g\ m^{-3}$ ],  $k_La$  is the volumetric mass transfer coefficient [ $d^{-1}$ ] and  $t$  is the test time [ $d$ ].

The test was carried out at approximately 20 °C. To refer to standard conditions, the obtained  $k_La$  value at the test temperature was, according to ASCE<sup>18</sup>:

$$k_La_{20}=k_La*\theta^{(20-T)}$$

212 Where:  $k_{La20}$  is the volumetric mass transfer coefficient corrected to 20 °C and  $\theta = 1.024$  is the  
 213 recommended empirical temperature correction factor [-].  
 214 Nonlinear regression was performed in MS Excel (GRG nonlinear solver), to estimate the  $k_{La}$   
 215 and  $C_{\infty}^*$  values. The overall  $k_{La20}$  was  $30.6 \pm 0.4 \text{ d}^{-1}$ . The results of the re-oxygenation test are  
 216 reported in Figure SI.12.1 and Table SI.12.1.

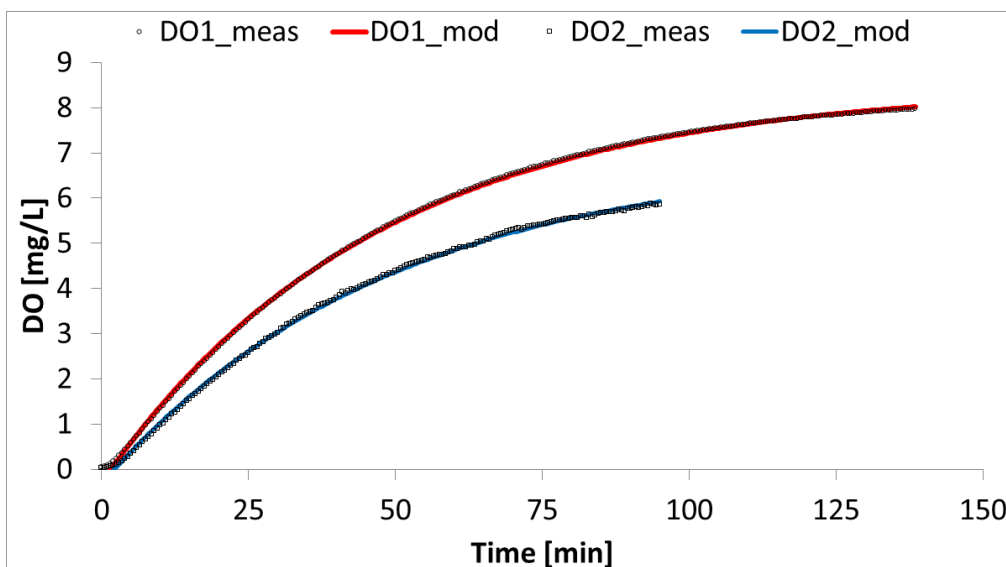

217

218 **Figure SI.12.1.** Measured and modelled DO data (DO<sub>1</sub>: DO data measured immediately after the paddlewheel, DO<sub>2</sub>:  
 219 DO data measured on the opposite side).  
 220

221

222

223

224 **Table. SI.12.1.** Estimated  $k_{La}$  values for the HRABP (DO<sub>1</sub>: DO data measured immediately after the paddlewheel, DO<sub>2</sub>:  
 225 DO data measured on the opposite side). The overall value is indicated as average  $\pm$  standard deviation of the two  
 measurements.

| Parameter   | Unit               | DO <sub>1</sub> | DO <sub>2</sub> | Overall        |
|-------------|--------------------|-----------------|-----------------|----------------|
| Temperature | [°C]               | 20.0            | 19.3            | -              |
| $k_{La}$    | [d <sup>-1</sup> ] | 30.9            | 29.9            | $30.4 \pm 0.7$ |
| $k_{La20}$  | [d <sup>-1</sup> ] | 30.9            | 30.3            | $30.6 \pm 0.4$ |

### SI.13 Parameter uncertainty and error propagation

Once the model was calibrated and validated, a dynamic sensitivity analysis was run, including all the experimental periods covered from the monitoring campaigns (i.e. 31/05/2016 – 06/12/2016), therefore using the actual environmental conditions (and not the average values, as shown in the manuscript in Figure 1). The sensitivity functions were then computed in these real conditions for all the most sensitive parameters investigated, again choosing the absolute-relative sensitivity function (equation SI.13.1).

The parameter standard deviation was then derived from the Fisher Information Matrix  $F$ . The Fisher analysis is based on the local sensitivity functions  $\partial_{y_i, p_j}^{a,r}$ , and turned out to be efficient for biological dynamic systems<sup>20,21</sup>. The  $F$  matrix (Eq. SI.13.3) was computed from the sensitivity matrix  $\Delta$   $Y_p$  (Equation SI.13.2) and the covariance matrix of measured standard deviations,  $C$ . The standard deviation  $\delta_j$  associated to parameters  $p_j$  was then computed as reported in Eq. SI.13.4.

$$\partial_{y_i, p_j}^{a,r} = \frac{\partial y_i}{\partial p_j} \quad \text{SI.13.1}$$

$$\Delta = \left[ \frac{\partial y}{\partial p_1}, \dots, \frac{\partial y}{\partial p_m} \right] \quad \text{SI.13.2}$$

$$F = \sum_{k=1}^K \Delta^T C^{-1} \Delta \quad \text{SI.13.3}$$

$$\delta_j^2 = (F^{-1})_{j,j} \quad \text{SI.13.4}$$

241 After performing the sensitivity analysis, and estimating the parameter standard error, as  
242 described above, the error propagation  $\sigma_{y_i}$  of the model predictions for  $y_i$  was also computed  
243 (equation SI.13.5):

$$\sigma_{y_i}(t) = \sqrt{\sum_{j=1}^m \left( \frac{\partial y_i}{\partial p_j}(t) \right)^2 \sigma_{p_j}^2} \quad \text{SI.13.5}$$

244

245 Where:  $p_j$  are the model parameters,  $\sigma_{p_j}$  their standard deviations,  $y_i(p_1, \dots, p_m)$  is the model  
246 solution for each predicted state  $y_i$ , at a given time  $t$ , and  $\sigma_{y_i}$  is the prediction standard deviation of  
247 the model result. Then, the 95% confidence intervals on the modelled predictions of relevant  
248 parameters (i.e., TSS, COD<sub>s</sub>, X<sub>ALG</sub>, S<sub>NH</sub>, S<sub>NO2</sub>, S<sub>NO3</sub>, and S<sub>O2</sub>) were estimated by the interval  $\left[ y_i - 1.96 \right.$   
249  $\left. \sigma_{y_i} \quad y_i + 1.96 \sigma_{y_i} \right]$  and are shown in the manuscript in Figure 2 and 3.

250

251

252 **Table SI.13.1.** Most sensible parameters identified from the sensitivity analysis performed (as briefly described in the manuscript, Section 2.2.3, and more in detail in  
 253 Casagli et al.<sup>1</sup>); the nominal and calibrated values with their standard deviation (obtained with the procedure described above, Eq.SI.13.4).

| Parameter/Symbol                                                             | Nominal value                                   |       |      | Reference  | Calibrated value                                              |         |      | St.Dev.                                                         |      |         |
|------------------------------------------------------------------------------|-------------------------------------------------|-------|------|------------|---------------------------------------------------------------|---------|------|-----------------------------------------------------------------|------|---------|
| Algae maximum specific growth rate [ $\mu_{\max,g,ALG}$ ]                    | 1.5 d <sup>-1</sup>                             |       |      | 22         | 2.5 d <sup>-1</sup>                                           |         |      | 0.019 d <sup>-1</sup>                                           |      |         |
| AOB maximum specific growth rate [ $\mu_{\max,g,AOB}$ ]                      | 0.9 d <sup>-1</sup>                             |       |      | 6          | 0.72 d <sup>-1</sup>                                          |         |      | 0.056 d <sup>-1</sup>                                           |      |         |
| NOB maximum specific growth [ $\mu_{\max,g,NOB}$ ]                           | 0.67 d <sup>-1</sup>                            |       |      | 6          | 0.65 d <sup>-1</sup>                                          |         |      | 0.002 d <sup>-1</sup>                                           |      |         |
| Light optimal value for growth [ $I_{OPT}$ ]                                 | 275 $\mu\text{mol m}^{-2} \text{s}^{-1}$        |       |      | 13         | 300 $\mu\text{mol m}^{-2} \text{s}^{-1}$                      |         |      | 6.270 $\mu\text{mol m}^{-2} \text{s}^{-1}$                      |      |         |
| Light extinction coefficient [ $\epsilon$ ]                                  | 0.067 $\pm$ 0.001 $\text{m}^2 \text{gCOD}^{-1}$ |       |      | [measured] | -                                                             |         |      | 0.005 $\text{m}^2 \text{gCOD}^{-1}$                             |      |         |
| Initial slope of PI curve [ $\alpha$ ]                                       | 0.027                                           |       |      | 13         | 0.01 $\mu\text{mol}^{-1} \text{m}^2 \text{s}^1 \text{d}^{-1}$ |         |      | 0.0008 $\mu\text{mol}^{-1} \text{m}^2 \text{s}^1 \text{d}^{-1}$ |      |         |
| Mass transfer coefficient [ $k_{La}$ ]                                       | 25 d <sup>-1</sup>                              |       |      | 9          | 34 d <sup>-1</sup>                                            |         |      | 0.172 d <sup>-1</sup>                                           |      |         |
| Coefficient for temperature correction for hydrolysis [ $\theta_{Hyd}$ ]     | 1.07                                            |       |      | 5          | 1.04                                                          |         |      | 0.007                                                           |      |         |
| Coefficient for temperature correction for ammonification [ $\theta_{AMM}$ ] | 1.07                                            |       |      | 5          | 1.12                                                          |         |      | -                                                               |      |         |
| Parameter/Symbol                                                             | Nominal value                                   |       |      | Reference  | Calibrated value and St.Dev.                                  |         |      |                                                                 |      |         |
|                                                                              | Min                                             | Opt   | Max  |            | Min                                                           | St.Dev. | Opt  | St.Dev.                                                         | Max  | St.Dev. |
| Cardinal temperature values for $X_{ALG}$ [CTMI]                             | 1.1                                             | 32.5  | 39.3 | 23         | -10                                                           | 3.021   | 20   | 0.296                                                           | 42   | 0.671   |
| Cardinal temperature values for $X_{AOB}$ [CTMI]                             | 5                                               | 25-35 | 35   | 10         | -8                                                            | 2.249   | 24.5 | 0.382                                                           | 40   | 1.174   |
| Cardinal temperature values for $X_{NOB}$ [CTMI]                             | 5                                               | 25-30 | 37   | 10         | -8                                                            | 7.310   | 20   | 0.988                                                           | 38.5 | 0.272   |
| Cardinal temperature values for $X_H$ [CTMI]                                 | 5                                               | 40    | 47   | 24         | -3                                                            | 5.091   | 25   | 1.450                                                           | 42   | 6.257   |
| Cardinal pH values for $X_{ALG}$ [CPM]                                       | 2.24                                            | 7.34  | 10   | 25         | 2                                                             | 1.240   | 8.4  | 0.428                                                           | 12   | 0.826   |
| Cardinal pH values for $X_{AOB}$ [CPM]                                       | 5.8                                             | 7.8-8 | 9    | 10         | 5.8                                                           | 0.029   | 8.1  | 0.095                                                           | 12.3 | 0.724   |
| Cardinal pH values for $X_{NOB}$ [CPM]                                       | 6.5                                             | 7.6-8 | 8.6  | 10         | 5                                                             | 0.053   | 7.9  | 0.031                                                           | 12.1 | 1.644   |
| Cardinal pH values for $X_H$ [CPM]                                           | 4                                               | 7     | 9    | 26         | 2                                                             | 7.598   | 7    | 0.984                                                           | 11.5 | 0.446   |

Notes: The cardinal temperature values are expressed in °C;  $\pm$  St.Dev. is the standard deviation computed for the calibrated parameters .

254

## SI.14 Residual analysis results

A)

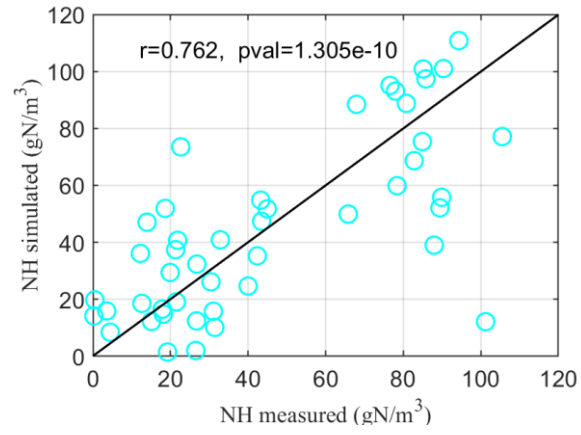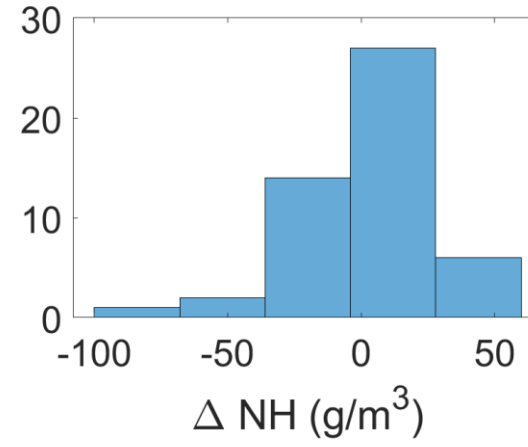

B)

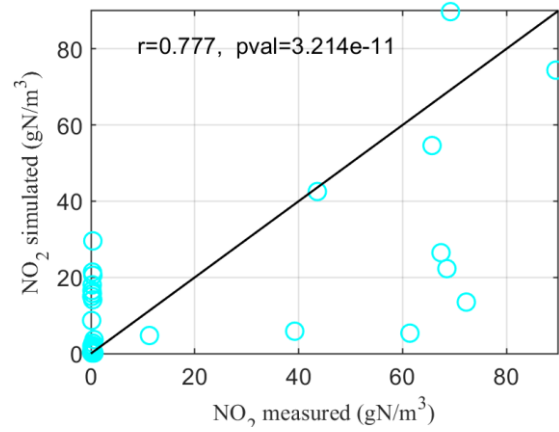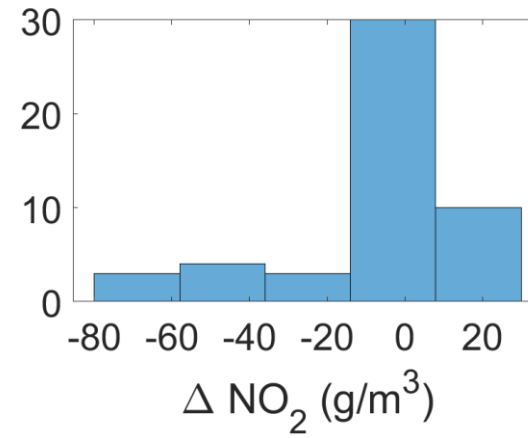

C)

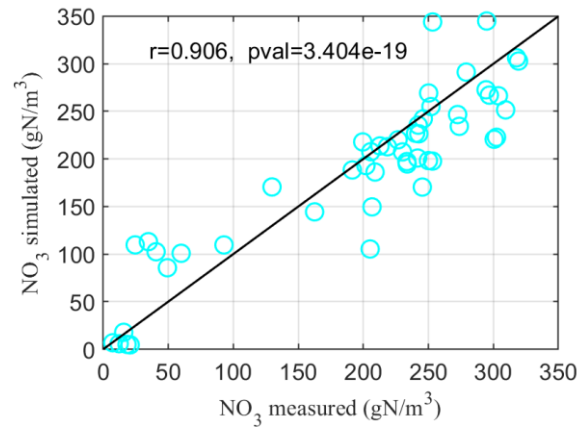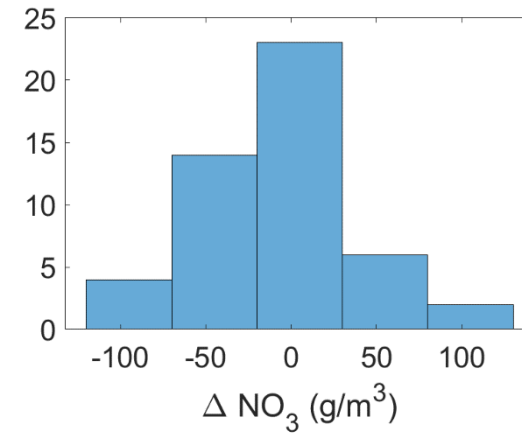

D)

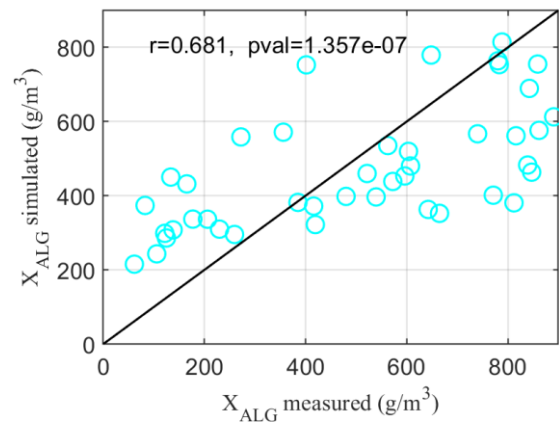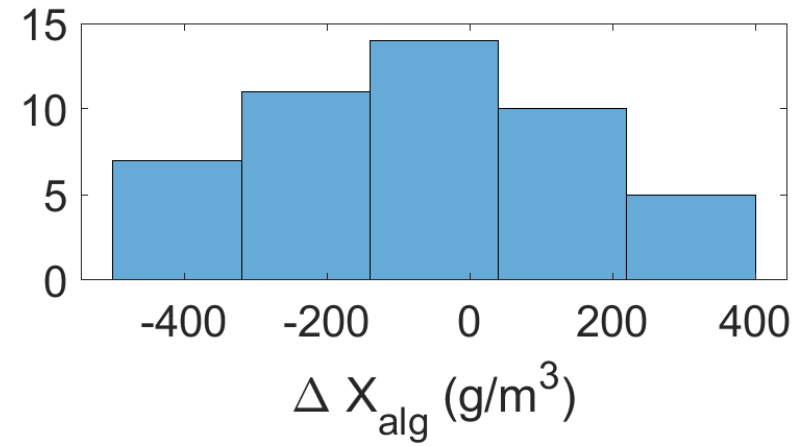

E)

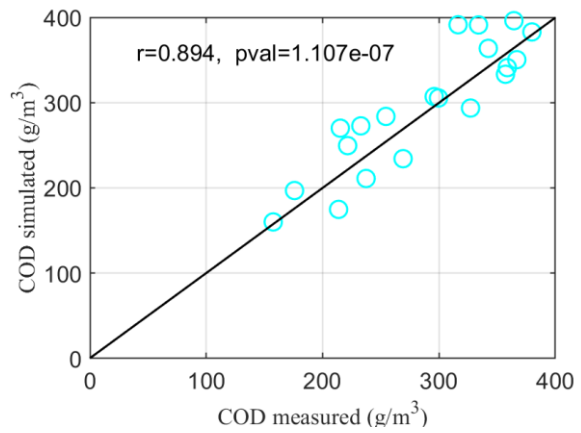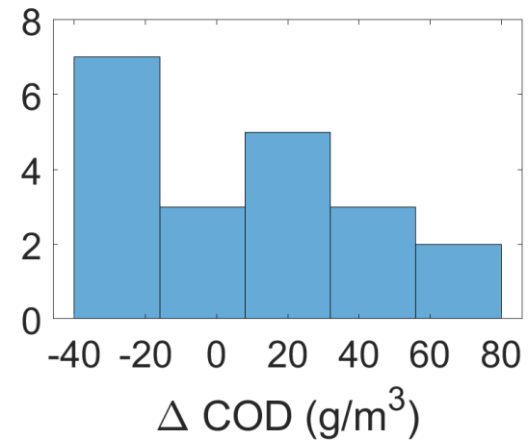

F)

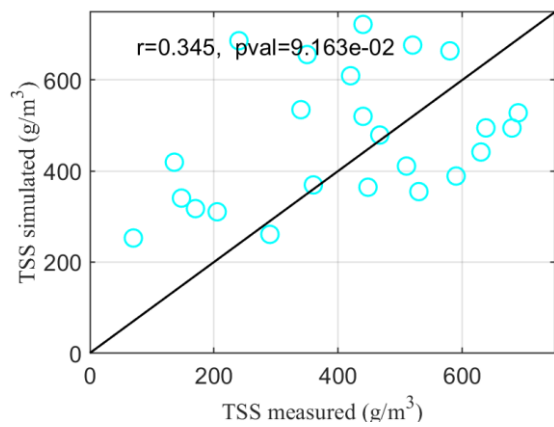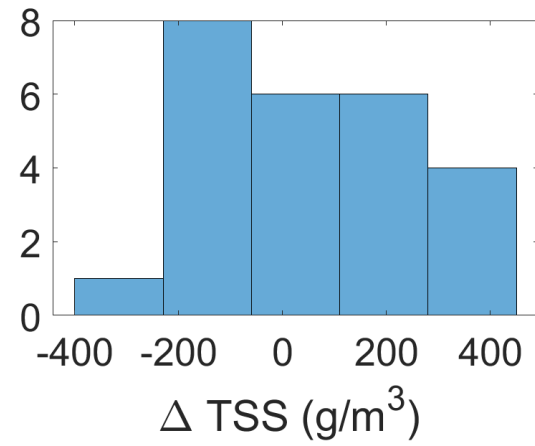



G)

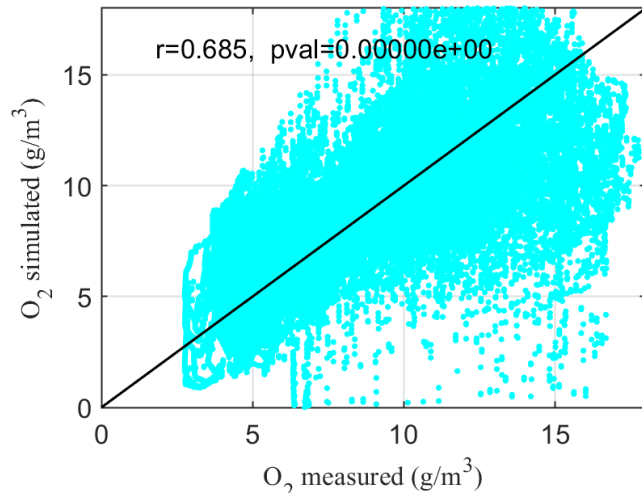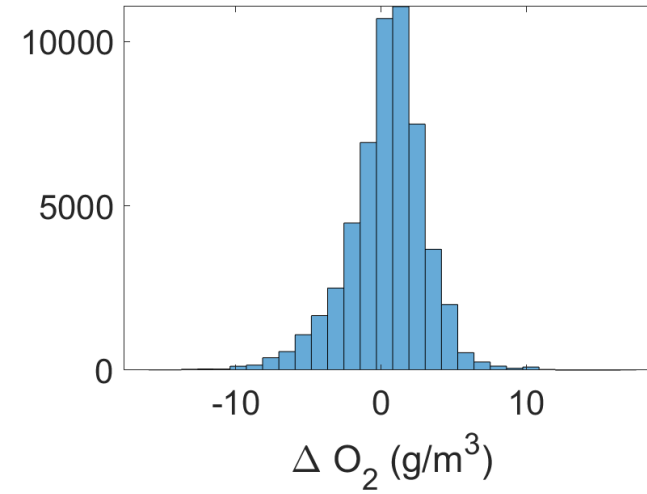

H)

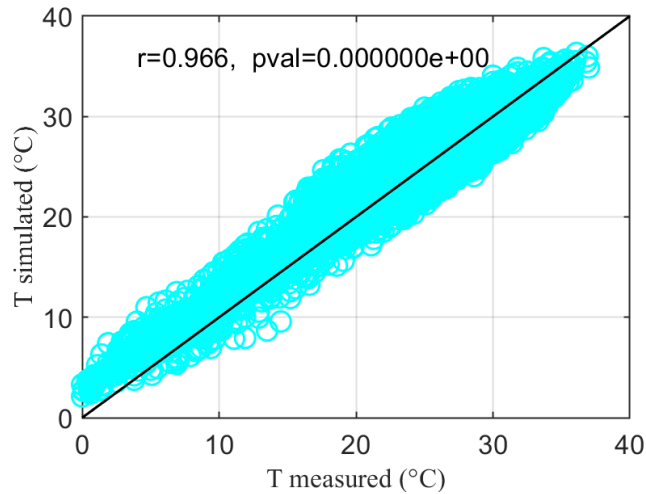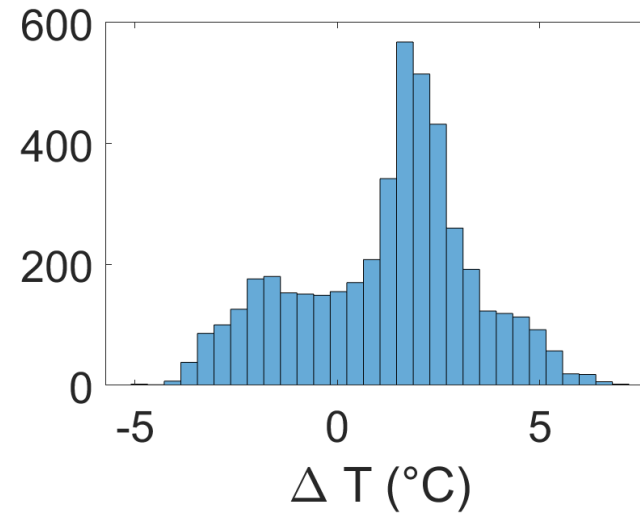

256 **Figure SI.14.1.** Simulated vs measured data (left) and residual analysis (right) for the monitored variables: A) ammonium [ $gN\ m^{-3}$ ]; B) nitrite [ $gN\ m^{-3}$ ]; C) nitrate [ $gN\ m^{-3}$ ];  
 257  $^3$ ]; D) algal biomass [ $gCOD\ m^{-3}$ ]; E) Soluble COD [ $gCOD\ m^{-3}$ ]; F) Total Suspended Solids [ $gTSS\ m^{-3}$ ]; G) Dissolved oxygen [ $gO_2\ m^{-3}$ ]; H) Temperature in the pond [ $^{\circ}C$ ].  
 258 pval is the p-value computed.

## Sl.15 Economic computation for alkalinity addition in the raceway

An economic analysis accounting for the price of soda to regulate alkalinity was performed.

Alkalinity in the reactor was assumed to be increased through addition of NaOH, that has a unit cost of approximately 0.4 \$ kg<sup>-1</sup>. Considering the molecular weight of NaOH (40 g mol<sup>-1</sup>) and the additional alkalinity of 20 mol m<sup>-3</sup> (obtained by increasing the influent alkalinity). The resulting alkalinity request is 0.8 kg(NaOH) m<sup>-3</sup> leading to a cost for adding NaOH of 0.32 \$ m<sup>-3</sup>.

From scenario analysis simulation results, the actual nitrogen removal rate (i.e. considering NH<sub>3</sub> stripped as untreated nitrogen) for Spring season (Tab Sl.10.1), was considered. Specifically for the scenarios S4 (HRT 5 d, liquid depth 0.2, no alkalinity addition in the influent) and S11 (HRT 5 d, liquid depth 0.2, increased influent alkalinity), the actual nitrogen removal rate was 11.41 gN-TAN m<sup>-2</sup> d<sup>-1</sup> and 16.29 gN-TAN m<sup>-2</sup> d<sup>-1</sup> respectively, with a gain of 4.88 gN-TAN m<sup>-2</sup> d<sup>-1</sup> in S11, representing approximately a 30% increase in the nitrogen removal rate. Considering an operational cost for treating nitrogen of 6 \$ kgN<sup>-1</sup> (Lin et al.<sup>27</sup>), it means that treating an additional 30% of nitrogen with additional alkalinity has a value estimated to be 0.03 \$ m<sup>-2</sup> d<sup>-1</sup>.

The cost of alkalinity addition is 0.0128 \$ m<sup>-2</sup> d<sup>-1</sup> which is definitely counter balanced by the increase in nitrogen treatment efficiency.

- 280 (1) Casagli, F.; Zuccaro, G.; Bernard, O.; Steyer, J.-P.; Ficara, E. ALBA: A Comprehensive Growth Model to  
 281 Optimize Algae-Bacteria Wastewater Treatment in Raceway Ponds. *Water Res.* **2021**, *190*, 116734.  
 282 <https://doi.org/10.1016/j.watres.2020.116734>.
- 283 (2) Dickson, A. G. The Development of the Alkalinity Concept in Marine Chemistry. *Mar. Chem.* **1992**, *40* (1–2),  
 284 49–63. [https://doi.org/10.1016/0304-4203\(92\)90047-E](https://doi.org/10.1016/0304-4203(92)90047-E).
- 285 (3) D. A. Wolf-Gladrow; Zeebe, R. E.; Klaas, C.; Körtzinger, A.; Dickson, A. G. Total Alkalinity: The Explicit  
 286 Conservative Expression and Its Application to Biogeochemical Processes. *Mar. Chem.* **2007**, *106* (1–2),  
 287 287–300. <https://doi.org/10.1016/j.marchem.2007.01.006>.
- 288 (4) Henze, M.; Gujer, W.; Mino, T.; van Loosedrecht, M. Activated Sludge Models ASM1, ASM2, ASM2d and  
 289 ASM3. *Water Intell. Online* **2000**, *5* (0), 9781780402369–9781780402369.  
 290 <https://doi.org/10.2166/9781780402369>.
- 291 (5) Reichert, P.; Borchardt, D.; Henze, M.; Rauch, W.; Shanahan, P.; Somlyódy, L.; Vanrolleghem, P. E. River  
 292 Water Quality Model No. 1. *IWA Sci. Tech. Rep. No 12* **2002**.
- 293 (6) Arashiro, L. T.; Rada-Ariza, A. M.; Wang, M.; van der Steen, P.; Ergas, S. J. Modelling Shortcut Nitrogen  
 294 Removal from Wastewater Using an Algal–Bacterial Consortium. *Water Sci. Technol.* **2017**, *75* (4), 782–  
 295 792. <https://doi.org/10.2166/wst.2016.561>.
- 296 (7) Batstone, D. J.; Keller, J.; Angelidaki, I.; Kalyuzhnyi, S. V.; Pavlostathis, S. G.; Rozzi, A.; Sanders, W. T. M.;  
 297 Siegrist, H.; Vavilin, V. A. The IWA Anaerobic Digestion Model No 1 (ADM1). *Water Sci. Technol.* **2002**, *45*  
 298 (10), 65–73. <https://doi.org/10.2166/wst.2002.0292>.
- 299 (8) Solimeno, A.; Parker, L.; Lundquist, T.; García, J. Integral Microalgae-Bacteria Model (BIO\_ALGAE):  
 300 Application to Wastewater High Rate Algal Ponds. *Sci. Total Environ.* **2017**, *601–602*, 646–657.  
 301 <https://doi.org/10.1016/j.scitotenv.2017.05.215>.
- 302 (9) Decostere, B.; De Craene, J.; Van Hoey, S.; Vervaeren, H.; Nopens, I.; Van Hulle, S. W. H. Validation of a  
 303 Microalgal Growth Model Accounting with Inorganic Carbon and Nutrient Kinetics for Wastewater  
 304 Treatment. *Chem. Eng. J.* **2016**, *285*, 189–197. <https://doi.org/10.1016/j.cej.2015.09.111>.
- 305 (10) Jubany Güell, I. *Operation, modeling and automatic control of complete and partial nitrification of highly*  
 306 *concentrated ammonium wastewater*; Universitat Autònoma de Barcelona, 2007.
- 307 (11) Wiesmann, U. Biological Nitrogen Removal from Wastewater. In *Biotechnics/Wastewater*; Advances in  
 308 Biochemical Engineering/Biotechnology; Springer: Berlin, Heidelberg, 1994; pp 113–154.  
 309 <https://doi.org/10.1007/BFb0008736>.
- 310 (12) M.K. de Kreuk; Picioreanu, C.; Hosseini, M.; Xavier, J. B.; van Loosdrecht, M. C. M. Kinetic Model of a  
 311 Granular Sludge SBR: Influences on Nutrient Removal. *Biotechnol. Bioeng.* **2007**, *97* (4), 801–815.  
 312 <https://doi.org/10.1002/bit.21196>.
- 313 (13) Martínez, C.; Mairet, F.; Bernard, O. Theory of Turbid Microalgae Cultures. *J. Theor. Biol.* **2018**, *456*, 190–  
 314 200. <https://doi.org/10.1016/j.jtbi.2018.07.016>.
- 315 (14) Ginot, V.; Hervé, J.-C. Estimating the Parameters of Dissolved Oxygen Dynamics in Shallow Ponds. *Ecol.*  
 316 *Model.* **1994**, *73* (3), 169–187. [https://doi.org/10.1016/0304-3800\(94\)90061-2](https://doi.org/10.1016/0304-3800(94)90061-2).
- 317 (15) Metcalf; Eddy. *Wastewater Engineering: Treatment and Resource Recovery*; McGraw-Hill education, 2014.
- 318 (16) Sander, R. Compilation of Henry's Law Constants (Version 4.0) for Water as Solvent. *Atmospheric Chem.*  
 319 *Phys.* **2015**, *15* (8), 4399–4981. <https://doi.org/10.5194/acp-15-4399-2015>.
- 320 (17) Perry, R.H. *Perry's Chemical Engineers' Handbook, 9th Edition*; Mcgraw hill education, 2019.
- 321 (18) ASCE. *Measurement of Oxygen Transfer in Clean Water | Standards*; 1992.
- 322 (19) Barceló-Villalobos, M.; Guzmán Sánchez, J. L.; Martín Cara, I.; Sánchez Molina, J. A.; Acien Fernández, F.  
 323 G. Analysis of Mass Transfer Capacity in Raceway Reactors. *Algal Res.* **2018**, *35*, 91–97.  
 324 <https://doi.org/10.1016/j.algal.2018.08.017>.
- 325 (20) Ejiófor, A. O.; Posten, C. H.; Solomon, B. O.; Deckwer, W.-D. A Robust Fed-Batch Feeding Strategy for  
 326 Optimal Parameter Estimation for Baker's Yeast Production. *Bioprocess Eng.* **1994**, *11* (4), 135–144.  
 327 <https://doi.org/10.1007/BF00518735>.
- 328 (21) Vatcheva, I.; de Jong, H.; Bernard, O.; Mars, N. J. I. Experiment Selection for the Discrimination of Semi-  
 329 Quantitative Models of Dynamical Systems. *Artif. Intell.* **2006**, *170* (4–5), 472–506.  
 330 <https://doi.org/10.1016/j.artint.2005.11.001>.
- 331 (22) Solimeno, A.; Gómez-Serrano, C.; Acien, F. G. BIO\_ALGAE 2: Improved Model of Microalgae and Bacteria  
 332 Consortia for Wastewater Treatment. *Environ. Sci. Pollut. Res.* **2019**, *26* (25), 25855–25868.  
 333 <https://doi.org/10.1007/s11356-019-05824-5>.
- 334 (23) Bernard, O.; Rémond, B. Validation of a Simple Model Accounting for Light and Temperature Effect on  
 335 Microalgal Growth. *Bioresour. Technol.* **2012**, *123*, 520–527. <https://doi.org/10.1016/j.biortech.2012.07.022>.

- 336 (24) Rosso, L.; Lobry, J. R.; Flandrois, J. P. An Unexpected Correlation between Cardinal Temperatures of  
337 Microbial Growth Highlighted by a New Model. *J. Theor. Biol.* **1993**, *162* (4), 447–463.
- 338 (25) Ippoliti, D.; Gómez, C.; del Mar Morales-Amaral, M.; Pistocchi, R.; Fernández-Sevilla, J. M.; Acién, F. G.  
339 Modeling of Photosynthesis and Respiration Rate for *Isochrysis Galbana* (T-Iso) and Its Influence on the  
340 Production of This Strain. *Bioresour. Technol.* **2016**, *203*, 71–79.  
341 <https://doi.org/10.1016/j.biortech.2015.12.050>.
- 342 (26) Rosso, L.; Lobry, J. R.; Bajard, S.; Flandrois, J. P. Convenient Model To Describe the Combined Effects of  
343 Temperature and PH on Microbial Growth. *Appl. Environ. Microbiol.* **1995**, *61* (2), 610–616.  
344 <https://doi.org/10.1128/AEM.61.2.610-616.1995>.
- 345 (27) Lin, Y.; Guo, M.; Shah, N.; Stuckey, D. C. Economic and Environmental Evaluation of Nitrogen Removal  
346 and Recovery Methods from Wastewater. *Bioresour. Technol.* **2016**, *215*, 227–238.  
347 <https://doi.org/10.1016/j.biortech.2016.03.064>.  
348
